# Supplementary material
Source: PubMed Central journal article supplement (PMC4838193)
Supplement: NIHMS776060-supplement-Supplementary_Appendix.pdf [file NIHMS776060-supplement-Supplementary_Appendix.pdf]

# THE LANCET

## Respiratory Medicine

### Supplementary appendix

This appendix formed part of the original submission and has been peer reviewed. We post it as supplied by the authors.

Supplement to: Sweeney TE, Braviak L, Tato CM, Khatri P. Genome-wide expression for diagnosis of pulmonary tuberculosis: a multicohort analysis. *Lancet Respir Med* 2016; published online Feb 19. [http://dx.doi.org/10.1016/S2213-2600\(16\)00048-5](http://dx.doi.org/10.1016/S2213-2600(16)00048-5).

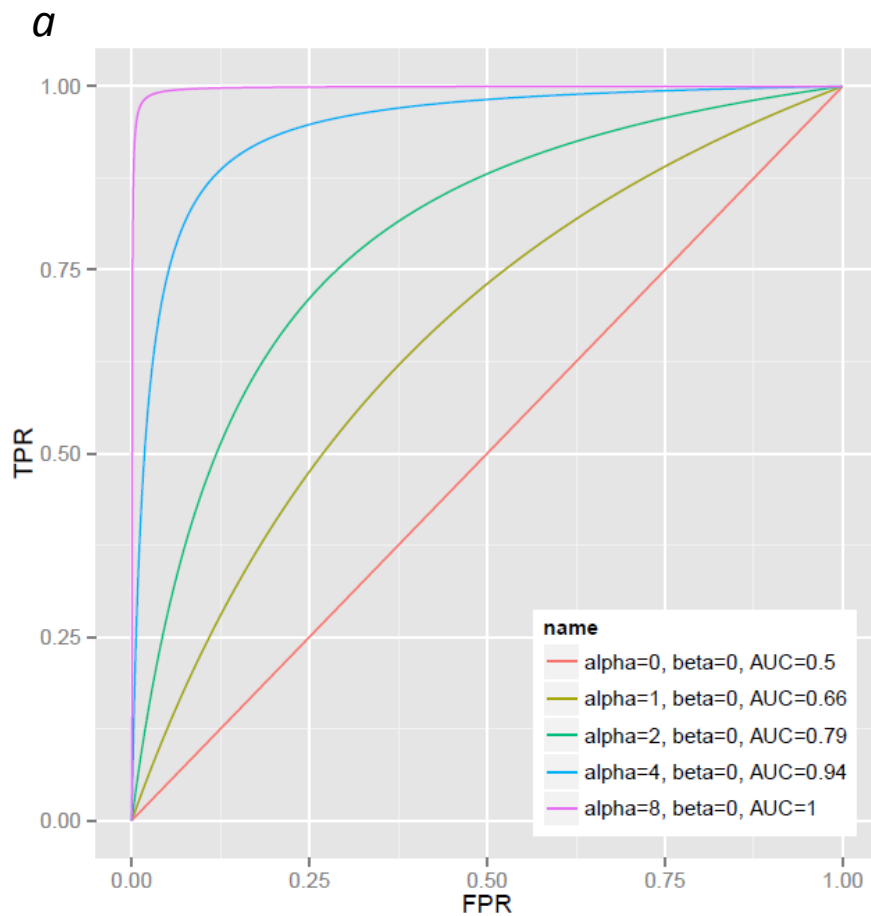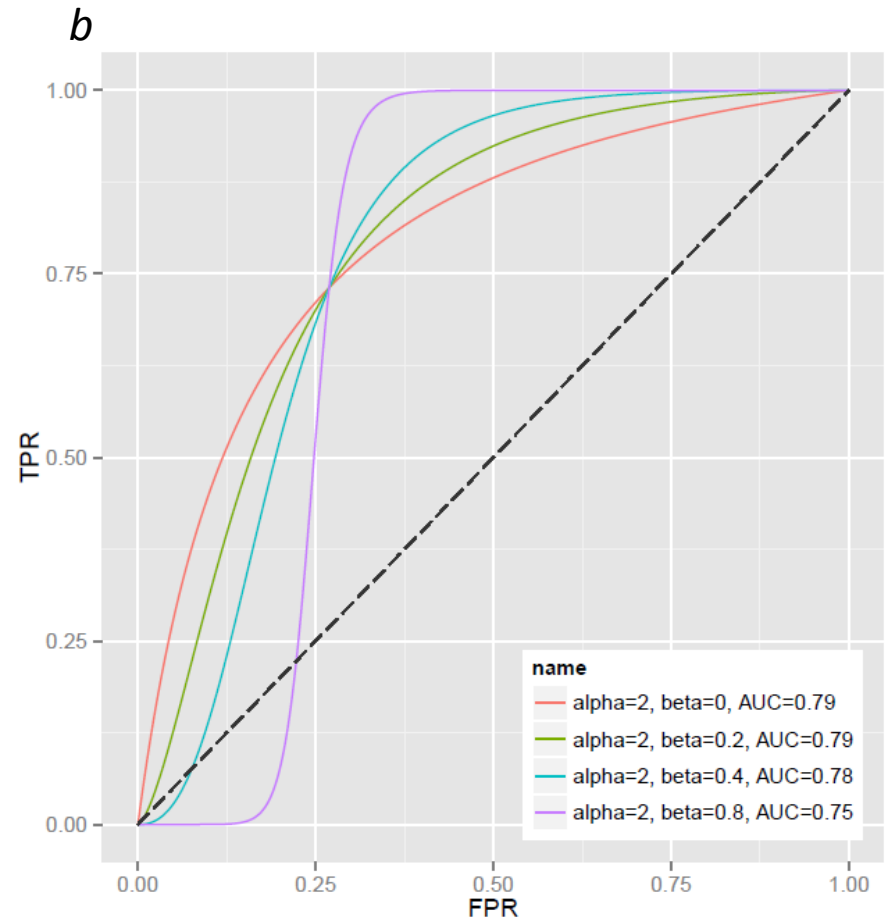

Appendix page 1. Example ROC curves constructed using the method of Kester and Buntinx for a range of (a) alpha and (b) beta, showing the effect of varying the different parameters on both ROC curve shape and AUC. For summary ROC curves, alpha and beta are calculated from a random-effects model from the contributing datasets.

Appendix P2. List of all genes found to be significant ( $q < 0.01$ ,  $ES > 1.5$  fold) in multi-cohort analysis, sorted according to absolute summary effect size.

|         | Number<br>of studies | Summary<br>effect size | Summary<br>std. error | p.value   | q.value (FDR) | tau squared | Q      | df | resid.hetero | p.value     |
|---------|----------------------|------------------------|-----------------------|-----------|---------------|-------------|--------|----|--------------|-------------|
| GBP5    | 3                    | 1.574                  | 0.368                 | 1.90E-05  | 0.000277495   | 0.382       | 35.899 | 2  |              | 1.60E-08    |
| ANKRD22 | 3                    | 1.443                  | 0.233                 | 6.27E-10  | 2.65E-08      | 0.152       | 30.041 | 2  |              | 3.00E-07    |
| GBP2    | 3                    | 1.367                  | 0.349                 | 8.93E-05  | 0.001059851   | 0.341       | 33.813 | 2  |              | 4.55E-08    |
| BATF2   | 3                    | 1.355                  | 0.223                 | 1.24E-09  | 4.97E-08      | 0.126       | 13.94  | 2  |              | 0.000939474 |
| WDFY1   | 3                    | 1.284                  | 0.248                 | 2.11E-07  | 5.24E-06      | 0.161       | 17.384 | 2  |              | 0.000167895 |
| GBP6    | 3                    | 1.284                  | 0.302                 | 2.14E-05  | 0.000308173   | 0.262       | 51.137 | 2  |              | 7.87E-12    |
| CD274   | 3                    | 1.271                  | 0.325                 | 9.14E-05  | 0.00108001    | 0.293       | 29.955 | 2  |              | 3.13E-07    |
| DUSP3   | 3                    | 1.27                   | 0.393                 | 0.0012232 | 0.009736512   | 0.44        | 43.46  | 2  |              | 3.65E-10    |
| VAMP5   | 3                    | 1.228                  | 0.231                 | 1.03E-07  | 2.76E-06      | 0.138       | 15.345 | 2  |              | 0.000465486 |
| C1QB    | 3                    | 1.184                  | 0.141                 | 4.83E-17  | 7.15E-15      | 0.039       | 5.805  | 2  |              | 0.054891213 |
| CASP5   | 3                    | 1.169                  | 0.252                 | 3.41E-06  | 6.09E-05      | 0.167       | 18.393 | 2  |              | 0.000101397 |
| FLVCR2  | 3                    | 1.161                  | 0.282                 | 3.75E-05  | 0.000499422   | 0.215       | 23.056 | 2  |              | 9.85E-06    |
| GBP1    | 3                    | 1.1                    | 0.1                   | 5.58E-28  | 3.73E-25      | 0.02        | 5.984  | 2  |              | 0.050189373 |
| FAM26F  | 3                    | 1.098                  | 0.201                 | 4.70E-08  | 1.38E-06      | 0.099       | 11.905 | 2  |              | 0.002598863 |
| ETV7    | 3                    | 1.084                  | 0.207                 | 1.76E-07  | 4.42E-06      | 0.107       | 12.709 | 2  |              | 0.001739083 |
| BRSK1   | 3                    | 1.076                  | 0.322                 | 0.0008389 | 0.007183124   | 0.289       | 30.567 | 2  |              | 2.30E-07    |
| LAP3    | 3                    | 1.06                   | 0.097                 | 7.36E-28  | 4.53E-25      | 0.01        | 2.976  | 2  |              | 0.225873562 |
| PSME2   | 3                    | 1.06                   | 0.121                 | 1.67E-18  | 3.34E-16      | 0.024       | 4.395  | 2  |              | 0.111098018 |
| TAP1    | 3                    | 1.054                  | 0.122                 | 7.20E-18  | 1.27E-15      | 0.025       | 4.515  | 2  |              | 0.104585959 |
| PSMB9   | 3                    | 1.046                  | 0.204                 | 2.81E-07  | 6.76E-06      | 0.113       | 24.752 | 2  |              | 4.22E-06    |
| C1QC    | 3                    | 1.044                  | 0.091                 | 1.16E-30  | 1.05E-27      | 0.007       | 2.676  | 2  |              | 0.262414434 |
| GBP4    | 3                    | 1.027                  | 0.101                 | 3.89E-24  | 1.50E-21      | 0.012       | 3.231  | 2  |              | 0.198778423 |
| SCO2    | 3                    | 1.026                  | 0.13                  | 2.34E-15  | 2.59E-13      | 0.03        | 5.083  | 2  |              | 0.078764017 |
| SOCS1   | 3                    | 1.017                  | 0.19                  | 8.49E-08  | 2.31E-06      | 0.087       | 10.795 | 2  |              | 0.004526958 |
| PSTPIP2 | 3                    | 1.017                  | 0.216                 | 2.49E-06  | 4.62E-05      | 0.119       | 13.952 | 2  |              | 0.000934147 |
| CACNA1E | 3                    | 1.006                  | 0.174                 | 7.67E-09  | 2.59E-07      | 0.07        | 9.096  | 2  |              | 0.010590192 |
| GK      | 3                    | 0.994                  | 0.125                 | 1.52E-15  | 1.75E-13      | 0.036       | 9.349  | 2  |              | 0.009328877 |

|           |   |       |       |           |             |       |        |   |             |
|-----------|---|-------|-------|-----------|-------------|-------|--------|---|-------------|
| LHFPL2    | 3 | 0.993 | 0.216 | 4.16E-06  | 7.27E-05    | 0.118 | 14.068 | 2 | 0.000881508 |
| C2        | 3 | 0.992 | 0.157 | 2.57E-10  | 1.18E-08    | 0.053 | 7.456  | 2 | 0.024036629 |
| GADD45B   | 3 | 0.984 | 0.116 | 2.38E-17  | 3.77E-15    | 0.021 | 4.133  | 2 | 0.126640068 |
| PDCD1LG2  | 3 | 0.981 | 0.073 | 9.46E-41  | 2.42E-37    | 0     | 1.909  | 2 | 0.385055613 |
| STAT1     | 3 | 0.974 | 0.122 | 1.27E-15  | 1.48E-13    | 0.037 | 13.425 | 2 | 0.001215437 |
| KCNJ2     | 3 | 0.974 | 0.221 | 1.09E-05  | 0.000171987 | 0.126 | 14.752 | 2 | 0.000626147 |
| AIM2      | 3 | 0.97  | 0.052 | 1.17E-77  | 1.80E-73    | 0     | 1.544  | 2 | 0.462092605 |
| SLC6A12   | 3 | 0.969 | 0.196 | 7.67E-07  | 1.62E-05    | 0.094 | 11.591 | 2 | 0.003041707 |
| P2RY14    | 3 | 0.931 | 0.121 | 1.77E-14  | 1.69E-12    | 0.037 | 13.394 | 2 | 0.001234303 |
| FRMD3     | 3 | 0.924 | 0.073 | 1.11E-36  | 2.43E-33    | 0     | 0.737  | 2 | 0.691754679 |
| C5        | 3 | 0.924 | 0.17  | 5.78E-08  | 1.65E-06    | 0.066 | 8.835  | 2 | 0.012062456 |
| TIFA      | 3 | 0.921 | 0.134 | 6.91E-12  | 4.15E-10    | 0.034 | 5.498  | 2 | 0.064001875 |
| TAP2      | 3 | 0.918 | 0.166 | 3.40E-08  | 1.03E-06    | 0.072 | 16.864 | 2 | 0.00021784  |
| TRAFD1    | 3 | 0.917 | 0.127 | 4.86E-13  | 3.61E-11    | 0.028 | 4.925  | 2 | 0.085235356 |
| SESTD1    | 3 | 0.913 | 0.093 | 1.66E-22  | 5.32E-20    | 0.008 | 2.871  | 2 | 0.238032687 |
| IFI30     | 3 | 0.91  | 0.073 | 1.14E-35  | 2.19E-32    | 0     | 0.547  | 2 | 0.760597893 |
| PARP14    | 3 | 0.9   | 0.073 | 5.60E-35  | 9.56E-32    | 0     | 0.681  | 2 | 0.711289799 |
| MOV10     | 3 | 0.897 | 0.106 | 2.05E-17  | 3.36E-15    | 0.015 | 3.516  | 2 | 0.172397986 |
| TRIM21    | 3 | 0.892 | 0.195 | 4.75E-06  | 8.18E-05    | 0.093 | 11.592 | 2 | 0.00303987  |
| TIMM10    | 3 | 0.889 | 0.094 | 2.89E-21  | 7.40E-19    | 0.009 | 2.899  | 2 | 0.234701745 |
| HIST2H2AC | 3 | 0.888 | 0.131 | 1.16E-11  | 6.70E-10    | 0.032 | 5.281  | 2 | 0.071319803 |
| CFB       | 3 | 0.888 | 0.166 | 8.72E-08  | 2.37E-06    | 0.062 | 8.425  | 2 | 0.014807989 |
| FBXO6     | 3 | 0.873 | 0.143 | 8.94E-10  | 3.69E-08    | 0.041 | 6.269  | 2 | 0.043511007 |
| EPSTI1    | 3 | 0.868 | 0.117 | 1.17E-13  | 9.78E-12    | 0.022 | 4.256  | 2 | 0.119075413 |
| TAPBPL    | 3 | 0.86  | 0.244 | 0.0004308 | 0.004086438 | 0.158 | 18.254 | 2 | 0.000108691 |
| KREMEN1   | 3 | 0.859 | 0.167 | 2.89E-07  | 6.89E-06    | 0.077 | 25.914 | 2 | 2.36E-06    |
| MICB      | 3 | 0.857 | 0.083 | 5.55E-25  | 2.37E-22    | 0.004 | 2.389  | 2 | 0.302916642 |
| RTP4      | 3 | 0.853 | 0.073 | 7.57E-32  | 8.95E-29    | 0     | 0.903  | 2 | 0.636725031 |
| SLAMF8    | 3 | 0.84  | 0.073 | 5.04E-31  | 4.85E-28    | 0     | 0.012  | 2 | 0.99388584  |
| KCNJ15    | 3 | 0.839 | 0.089 | 6.65E-21  | 1.62E-18    | 0.017 | 7.388  | 2 | 0.024868953 |

|          |   |       |       |           |             |       |        |   |             |
|----------|---|-------|-------|-----------|-------------|-------|--------|---|-------------|
| LMNB1    | 3 | 0.828 | 0.208 | 6.71E-05  | 0.000829611 | 0.108 | 13.273 | 2 | 0.001311632 |
| ZNF438   | 3 | 0.824 | 0.19  | 1.47E-05  | 0.000223401 | 0.088 | 11.153 | 2 | 0.00378622  |
| APOL6    | 3 | 0.823 | 0.073 | 1.70E-29  | 1.38E-26    | 0     | 2.016  | 2 | 0.364926861 |
| SP140    | 3 | 0.815 | 0.105 | 7.51E-15  | 7.65E-13    | 0.026 | 10.16  | 2 | 0.006221166 |
| EIF4G3   | 3 | 0.814 | 0.077 | 4.79E-26  | 2.37E-23    | 0.002 | 2.169  | 2 | 0.338071992 |
| IFITM3   | 3 | 0.806 | 0.072 | 7.72E-29  | 5.65E-26    | 0     | 1.039  | 2 | 0.594727199 |
| TRIM56   | 3 | 0.803 | 0.229 | 0.0004456 | 0.004206879 | 0.136 | 16.167 | 2 | 0.000308598 |
| DYNLT1   | 3 | 0.801 | 0.126 | 2.00E-10  | 9.40E-09    | 0.028 | 4.962  | 2 | 0.083652027 |
| ADM      | 3 | 0.786 | 0.102 | 1.43E-14  | 1.38E-12    | 0.013 | 3.381  | 2 | 0.184428485 |
| IFI35    | 3 | 0.784 | 0.072 | 1.82E-27  | 1.04E-24    | 0     | 1.264  | 2 | 0.531438766 |
| STAT2    | 3 | 0.776 | 0.072 | 5.59E-27  | 3.07E-24    | 0     | 0.275  | 2 | 0.871615806 |
| RARRES3  | 3 | 0.775 | 0.101 | 1.95E-14  | 1.84E-12    | 0.013 | 3.33   | 2 | 0.189186466 |
| FGL2     | 3 | 0.775 | 0.089 | 2.79E-18  | 5.36E-16    | 0.006 | 2.688  | 2 | 0.260859625 |
| TNFSF10  | 3 | 0.775 | 0.072 | 6.90E-27  | 3.66E-24    | 0     | 0.489  | 2 | 0.783210975 |
| CEACAM1  | 3 | 0.773 | 0.047 | 1.12E-60  | 8.63E-57    | 0.001 | 2.348  | 2 | 0.309098332 |
| PARP9    | 3 | 0.761 | 0.068 | 2.63E-29  | 2.02E-26    | 0.005 | 3.029  | 2 | 0.219965993 |
| IGF2BP3  | 3 | 0.76  | 0.127 | 2.08E-09  | 7.99E-08    | 0.029 | 5.066  | 2 | 0.079410063 |
| HIST1H3D | 3 | 0.759 | 0.106 | 8.91E-13  | 6.40E-11    | 0.015 | 3.624  | 2 | 0.163337865 |
| FAM111A  | 3 | 0.755 | 0.225 | 0.0008015 | 0.006928204 | 0.142 | 31.654 | 2 | 1.34E-07    |
| C1QA     | 3 | 0.755 | 0.152 | 6.64E-07  | 1.43E-05    | 0.049 | 7.245  | 2 | 0.026718449 |
| APOL1    | 3 | 0.753 | 0.131 | 8.64E-09  | 2.88E-07    | 0.041 | 10.731 | 2 | 0.004676191 |
| BST2     | 3 | 0.752 | 0.121 | 5.31E-10  | 2.31E-08    | 0.025 | 4.618  | 2 | 0.099336644 |
| EPB41L3  | 3 | 0.751 | 0.231 | 0.0011138 | 0.009062602 | 0.139 | 16.529 | 2 | 0.000257502 |
| ATF5     | 3 | 0.751 | 0.072 | 1.92E-25  | 8.94E-23    | 0     | 1.899  | 2 | 0.387007848 |
| PLAUR    | 3 | 0.75  | 0.218 | 0.0005877 | 0.005319643 | 0.136 | 44.678 | 2 | 1.99E-10    |
| SAMD9L   | 3 | 0.736 | 0.072 | 1.78E-24  | 7.21E-22    | 0     | 1.527  | 2 | 0.466101427 |
| IFIT3    | 3 | 0.734 | 0.119 | 6.45E-10  | 2.70E-08    | 0.035 | 13.251 | 2 | 0.001326337 |
| MR1      | 3 | 0.731 | 0.12  | 1.19E-09  | 4.80E-08    | 0.024 | 4.604  | 2 | 0.100069318 |
| XAF1     | 3 | 0.731 | 0.151 | 1.27E-06  | 2.56E-05    | 0.058 | 14.216 | 2 | 0.000818734 |
| USF1     | 3 | 0.73  | 0.126 | 6.36E-09  | 2.19E-07    | 0.037 | 9.876  | 2 | 0.007168402 |

|         |   |       |       |           |             |       |        |   |             |
|---------|---|-------|-------|-----------|-------------|-------|--------|---|-------------|
| DHRS12  | 3 | 0.727 | 0.18  | 5.62E-05  | 0.000711263 | 0.091 | 30.464 | 2 | 2.43E-07    |
| IGSF6   | 3 | 0.722 | 0.193 | 0.000176  | 0.001898478 | 0.091 | 11.586 | 2 | 0.003048454 |
| SLC26A8 | 3 | 0.721 | 0.087 | 1.73E-16  | 2.37E-14    | 0.018 | 9.623  | 2 | 0.008135549 |
| CYBB    | 3 | 0.719 | 0.072 | 1.60E-23  | 6.01E-21    | 0     | 0.598  | 2 | 0.741434758 |
| TRIM22  | 3 | 0.711 | 0.178 | 6.32E-05  | 0.000787765 | 0.074 | 9.846  | 2 | 0.007276785 |
| IL27    | 3 | 0.71  | 0.18  | 8.26E-05  | 0.000989568 | 0.077 | 10.214 | 2 | 0.00605271  |
| RAB24   | 3 | 0.71  | 0.204 | 0.0004978 | 0.004628401 | 0.12  | 65.274 | 2 | 6.66E-15    |
| PSME1   | 3 | 0.709 | 0.133 | 1.06E-07  | 2.83E-06    | 0.043 | 11.163 | 2 | 0.003767782 |
| TMEM140 | 3 | 0.706 | 0.087 | 6.91E-16  | 8.51E-14    | 0.006 | 2.64   | 2 | 0.267161716 |
| SECTM1  | 3 | 0.704 | 0.122 | 8.03E-09  | 2.69E-07    | 0.026 | 4.756  | 2 | 0.092729384 |
| ATG3    | 3 | 0.699 | 0.08  | 1.89E-18  | 3.73E-16    | 0.01  | 4.029  | 2 | 0.133396695 |
| KARS    | 3 | 0.695 | 0.072 | 3.22E-22  | 9.90E-20    | 0     | 0.887  | 2 | 0.641683701 |
| TNFAIP2 | 3 | 0.695 | 0.107 | 7.09E-11  | 3.58E-09    | 0.016 | 3.684  | 2 | 0.158466306 |
| KIF1B   | 3 | 0.692 | 0.208 | 0.0009061 | 0.007647731 | 0.123 | 41.082 | 2 | 1.20E-09    |
| JAK2    | 3 | 0.688 | 0.072 | 7.94E-22  | 2.22E-19    | 0     | 1.952  | 2 | 0.376857509 |
| CNDP2   | 3 | 0.687 | 0.072 | 8.91E-22  | 2.45E-19    | 0     | 1.008  | 2 | 0.604132344 |
| CNIH4   | 3 | 0.687 | 0.21  | 0.0010986 | 0.008971636 | 0.112 | 13.877 | 2 | 0.000969801 |
| IFITM1  | 3 | 0.686 | 0.144 | 1.86E-06  | 3.57E-05    | 0.043 | 6.542  | 2 | 0.037977813 |
| LACTB   | 3 | 0.68  | 0.105 | 9.33E-11  | 4.63E-09    | 0.026 | 10.365 | 2 | 0.005613098 |
| TCN2    | 3 | 0.677 | 0.091 | 7.97E-14  | 6.92E-12    | 0.007 | 2.797  | 2 | 0.246936191 |
| ADCY3   | 3 | 0.677 | 0.175 | 0.0001066 | 0.001227128 | 0.071 | 9.617  | 2 | 0.008161259 |
| ACOT9   | 3 | 0.675 | 0.177 | 0.0001316 | 0.001475102 | 0.083 | 19.629 | 2 | 5.47E-05    |
| UBE2L6  | 3 | 0.675 | 0.087 | 8.32E-15  | 8.36E-13    | 0.016 | 7.077  | 2 | 0.029064067 |
| HPSE    | 3 | 0.675 | 0.062 | 1.52E-27  | 8.98E-25    | 0.003 | 2.658  | 2 | 0.264721861 |
| ALDH1A1 | 3 | 0.675 | 0.075 | 2.54E-19  | 5.43E-17    | 0.008 | 3.669  | 2 | 0.159682224 |
| SQRDL   | 3 | 0.67  | 0.082 | 3.39E-16  | 4.41E-14    | 0.004 | 2.404  | 2 | 0.30064679  |
| RHBDF2  | 3 | 0.669 | 0.19  | 0.0004199 | 0.004013253 | 0.103 | 44.707 | 2 | 1.96E-10    |
| LIMK2   | 3 | 0.666 | 0.149 | 7.78E-06  | 0.000126938 | 0.061 | 28.033 | 2 | 8.18E-07    |
| PRPS2   | 3 | 0.663 | 0.112 | 3.52E-09  | 1.30E-07    | 0.028 | 7.97   | 2 | 0.018591341 |
| IL15    | 3 | 0.66  | 0.128 | 2.26E-07  | 5.57E-06    | 0.044 | 20.476 | 2 | 3.58E-05    |

|           |   |       |       |           |             |       |        |   |             |
|-----------|---|-------|-------|-----------|-------------|-------|--------|---|-------------|
| HIST1H2BG | 3 | 0.659 | 0.072 | 3.56E-20  | 8.43E-18    | 0     | 1.389  | 2 | 0.499284234 |
| GPR65     | 3 | 0.659 | 0.177 | 0.0001922 | 0.002051609 | 0.083 | 19.71  | 2 | 5.25E-05    |
| DTX3L     | 3 | 0.658 | 0.132 | 6.43E-07  | 1.39E-05    | 0.033 | 5.578  | 2 | 0.061489104 |
| CASP1     | 3 | 0.657 | 0.08  | 3.12E-16  | 4.11E-14    | 0.013 | 6.025  | 2 | 0.049158857 |
| SORT1     | 3 | 0.651 | 0.197 | 0.0009706 | 0.008094196 | 0.097 | 12.296 | 2 | 0.00213792  |
| SAT1      | 3 | 0.648 | 0.072 | 1.29E-19  | 2.84E-17    | 0     | 0.475  | 2 | 0.78844407  |
| GPBAR1    | 3 | 0.646 | 0.173 | 0.0001876 | 0.002009268 | 0.079 | 18.919 | 2 | 7.79E-05    |
| KLHDC8B   | 3 | 0.645 | 0.121 | 1.03E-07  | 2.76E-06    | 0.025 | 4.729  | 2 | 0.093986648 |
| TNFSF13B  | 3 | 0.642 | 0.128 | 5.41E-07  | 1.20E-05    | 0.039 | 10.39  | 2 | 0.00554416  |
| TLR7      | 3 | 0.637 | 0.102 | 3.83E-10  | 1.70E-08    | 0.013 | 3.421  | 2 | 0.180731706 |
| OBFC2A    | 3 | 0.634 | 0.123 | 2.80E-07  | 6.75E-06    | 0.027 | 4.854  | 2 | 0.0883023   |
| ZCCHC6    | 3 | 0.632 | 0.071 | 9.68E-19  | 1.99E-16    | 0     | 0.435  | 2 | 0.804551786 |
| ZBP1      | 3 | 0.631 | 0.158 | 6.26E-05  | 0.000782546 | 0.055 | 7.864  | 2 | 0.019606348 |
| XRN1      | 3 | 0.63  | 0.091 | 4.43E-12  | 2.77E-10    | 0.015 | 5.237  | 2 | 0.072900748 |
| IFI6      | 3 | 0.628 | 0.149 | 2.57E-05  | 0.000361205 | 0.057 | 14.106 | 2 | 0.000864661 |
| MFSD7     | 3 | 0.627 | 0.136 | 3.78E-06  | 6.66E-05    | 0.036 | 5.868  | 2 | 0.053173459 |
| KYNU      | 3 | 0.624 | 0.166 | 0.0001711 | 0.001846936 | 0.072 | 17.507 | 2 | 0.000157918 |
| CTSL1     | 3 | 0.624 | 0.127 | 8.53E-07  | 1.78E-05    | 0.041 | 15.148 | 2 | 0.000513591 |
| FAS       | 3 | 0.623 | 0.051 | 6.81E-35  | 1.05E-31    | 0     | 1.118  | 2 | 0.571680966 |
| SRBD1     | 3 | 0.62  | 0.097 | 1.47E-10  | 7.08E-09    | 0.011 | 3.135  | 2 | 0.208523247 |
| BTN3A1    | 3 | 0.617 | 0.079 | 5.70E-15  | 5.96E-13    | 0.009 | 4.028  | 2 | 0.133439215 |
| PLSCR1    | 3 | 0.616 | 0.144 | 1.81E-05  | 0.000266265 | 0.042 | 6.532  | 2 | 0.038164925 |
| SCARF1    | 3 | 0.613 | 0.051 | 1.50E-33  | 1.92E-30    | 0     | 1.262  | 2 | 0.532075935 |
| HLA-DMA   | 3 | 0.612 | 0.171 | 0.0003354 | 0.003307439 | 0.067 | 9.235  | 2 | 0.009879833 |
| FAM20A    | 3 | 0.611 | 0.12  | 3.48E-07  | 8.12E-06    | 0.024 | 4.626  | 2 | 0.098954338 |
| SLITRK4   | 3 | 0.611 | 0.141 | 1.53E-05  | 0.000231871 | 0.04  | 6.35   | 2 | 0.041800713 |
| C5orf15   | 3 | 0.61  | 0.109 | 1.94E-08  | 6.09E-07    | 0.017 | 3.85   | 2 | 0.145871498 |
| ASGR1     | 3 | 0.609 | 0.175 | 0.0005167 | 0.004763803 | 0.072 | 9.74   | 2 | 0.00767213  |
| LMO2      | 3 | 0.607 | 0.141 | 1.66E-05  | 0.00024622  | 0.04  | 6.302  | 2 | 0.042813603 |
| CDS2      | 3 | 0.607 | 0.072 | 3.41E-17  | 5.19E-15    | 0     | 2.022  | 2 | 0.363779764 |

|           |   |        |       |           |             |       |        |   |             |
|-----------|---|--------|-------|-----------|-------------|-------|--------|---|-------------|
| SIPA1L1   | 3 | 0.606  | 0.071 | 1.94E-17  | 3.21E-15    | 0     | 1.113  | 2 | 0.573209414 |
| CXCL10    | 3 | 0.605  | 0.071 | 2.32E-17  | 3.71E-15    | 0     | 0.847  | 2 | 0.654779493 |
| TMEM180   | 3 | 0.601  | 0.177 | 0.0006808 | 0.006030432 | 0.074 | 9.911  | 2 | 0.007044812 |
| LMTK2     | 3 | 0.596  | 0.097 | 6.55E-10  | 2.74E-08    | 0.01  | 3.132  | 2 | 0.208829662 |
| BAZ1A     | 3 | 0.595  | 0.095 | 4.49E-10  | 1.98E-08    | 0.018 | 5.788  | 2 | 0.055351089 |
| HIST2H2AB | 3 | 0.593  | 0.071 | 8.74E-17  | 1.24E-14    | 0     | 0.131  | 2 | 0.936483175 |
| MTHFD2    | 3 | 0.593  | 0.042 | 3.68E-46  | 1.42E-42    | 0     | 1.716  | 2 | 0.423924627 |
| FCER1G    | 3 | 0.593  | 0.13  | 5.28E-06  | 8.96E-05    | 0.032 | 5.428  | 2 | 0.066282799 |
| IFNAR1    | 3 | 0.587  | 0.138 | 2.06E-05  | 0.000298249 | 0.038 | 6.072  | 2 | 0.048015736 |
| TMEM51    | 3 | 0.587  | 0.13  | 5.93E-06  | 9.88E-05    | 0.031 | 5.388  | 2 | 0.067607336 |
| CUL1      | 3 | 0.586  | 0.071 | 2.16E-16  | 2.94E-14    | 0     | 0.727  | 2 | 0.695100417 |
| ZNF671    | 3 | -0.586 | 0.16  | 0.0002559 | 0.002630618 | 0.057 | 8.177  | 2 | 0.016763463 |
| CARD11    | 3 | -0.587 | 0.179 | 0.0010118 | 0.008387598 | 0.076 | 10.127 | 2 | 0.006322618 |
| WDR6      | 3 | -0.59  | 0.071 | 1.23E-16  | 1.71E-14    | 0     | 0.121  | 2 | 0.941134192 |
| TLE1      | 3 | -0.592 | 0.183 | 0.0011988 | 0.009586658 | 0.08  | 10.587 | 2 | 0.00502502  |
| HPCAL4    | 3 | -0.592 | 0.128 | 3.77E-06  | 6.66E-05    | 0.03  | 5.262  | 2 | 0.071998691 |
| ORAI1     | 3 | -0.592 | 0.13  | 5.35E-06  | 9.07E-05    | 0.032 | 5.425  | 2 | 0.066378384 |
| OXSRI     | 3 | -0.595 | 0.139 | 1.90E-05  | 0.000277899 | 0.039 | 6.173  | 2 | 0.045658819 |
| CYBASC3   | 3 | -0.596 | 0.1   | 2.20E-09  | 8.42E-08    | 0.012 | 3.305  | 2 | 0.191615784 |
| PPM1H     | 3 | -0.596 | 0.071 | 6.20E-17  | 8.99E-15    | 0     | 1.749  | 2 | 0.417042934 |
| CD28      | 3 | -0.597 | 0.177 | 0.000726  | 0.006372689 | 0.074 | 9.895  | 2 | 0.007100976 |
| EHBP1     | 3 | -0.599 | 0.18  | 0.000856  | 0.0073093   | 0.077 | 10.242 | 2 | 0.005971204 |
| TRRAP     | 3 | -0.599 | 0.071 | 4.46E-17  | 6.65E-15    | 0     | 1.715  | 2 | 0.42432118  |
| GOT2      | 3 | -0.6   | 0.147 | 4.78E-05  | 0.000617274 | 0.046 | 6.92   | 2 | 0.031431178 |
| PAFAH1B1  | 3 | -0.6   | 0.137 | 1.17E-05  | 0.00018215  | 0.037 | 5.975  | 2 | 0.050417714 |
| RPS4X     | 3 | -0.6   | 0.156 | 0.0001172 | 0.001335431 | 0.063 | 15.471 | 2 | 0.000437046 |
| SWAP70    | 3 | -0.601 | 0.121 | 7.51E-07  | 1.59E-05    | 0.025 | 4.738  | 2 | 0.093564529 |
| ABHD14A   | 3 | -0.602 | 0.163 | 0.000213  | 0.002243088 | 0.059 | 8.385  | 2 | 0.015105623 |
| CD5       | 3 | -0.603 | 0.186 | 0.0011945 | 0.009567027 | 0.084 | 10.979 | 2 | 0.004129196 |
| ERP27     | 3 | -0.603 | 0.071 | 3.05E-17  | 4.69E-15    | 0     | 1.882  | 2 | 0.390277371 |



|          |   |        |       |           |             |       |        |   |             |
|----------|---|--------|-------|-----------|-------------|-------|--------|---|-------------|
| HLA-DOB  | 3 | -0.604 | 0.155 | 0.0001022 | 0.001180533 | 0.053 | 7.688  | 2 | 0.021411388 |
| FAM84B   | 3 | -0.604 | 0.137 | 9.91E-06  | 0.000158002 | 0.037 | 5.963  | 2 | 0.050710696 |
| AGMAT    | 3 | -0.606 | 0.14  | 1.55E-05  | 0.000233521 | 0.04  | 6.258  | 2 | 0.043752888 |
| ALDH9A1  | 3 | -0.607 | 0.174 | 0.000495  | 0.004604862 | 0.071 | 9.623  | 2 | 0.008136561 |
| CD19     | 3 | -0.609 | 0.093 | 4.97E-11  | 2.54E-09    | 0.009 | 2.915  | 2 | 0.232808084 |
| SIN3A    | 3 | -0.61  | 0.071 | 1.24E-17  | 2.15E-15    | 0     | 0.011  | 2 | 0.994328331 |
| CD27     | 3 | -0.611 | 0.132 | 3.56E-06  | 6.32E-05    | 0.033 | 5.549  | 2 | 0.062389228 |
| EP400    | 3 | -0.612 | 0.071 | 1.06E-17  | 1.84E-15    | 0     | 0.772  | 2 | 0.679885211 |
| FNBP1    | 3 | -0.613 | 0.072 | 2.22E-17  | 3.60E-15    | 0     | 2.029  | 2 | 0.362558261 |
| TPK1     | 3 | -0.618 | 0.072 | 5.76E-18  | 1.04E-15    | 0.006 | 3.388  | 2 | 0.183738235 |
| ASF1B    | 3 | -0.621 | 0.071 | 3.50E-18  | 6.48E-16    | 0     | 1.831  | 2 | 0.400262413 |
| IMPDH2   | 3 | -0.622 | 0.071 | 3.26E-18  | 6.19E-16    | 0     | 1.562  | 2 | 0.457890027 |
| CD79A    | 3 | -0.623 | 0.155 | 5.82E-05  | 0.000734953 | 0.065 | 22.797 | 2 | 1.12E-05    |
| SMYD3    | 3 | -0.624 | 0.085 | 2.44E-13  | 1.93E-11    | 0.005 | 2.551  | 2 | 0.279345088 |
| PLCG1    | 3 | -0.629 | 0.193 | 0.0011049 | 0.009013592 | 0.101 | 23.614 | 2 | 7.45E-06    |
| TXK      | 3 | -0.631 | 0.17  | 0.000211  | 0.002226883 | 0.067 | 9.179  | 2 | 0.010158861 |
| SUSD3    | 3 | -0.632 | 0.138 | 4.91E-06  | 8.40E-05    | 0.038 | 6.087  | 2 | 0.047656284 |
| GZMK     | 3 | -0.633 | 0.165 | 0.0001268 | 0.00142902  | 0.062 | 8.624  | 2 | 0.013406411 |
| TOMM20   | 3 | -0.633 | 0.194 | 0.0011092 | 0.009044108 | 0.099 | 18.054 | 2 | 0.000120108 |
| GTF3A    | 3 | -0.637 | 0.162 | 8.07E-05  | 0.000968633 | 0.058 | 8.257  | 2 | 0.016109102 |
| FAM129C  | 3 | -0.639 | 0.132 | 1.34E-06  | 2.69E-05    | 0.033 | 5.584  | 2 | 0.061313259 |
| SH2D3A   | 3 | -0.639 | 0.161 | 7.01E-05  | 0.000859076 | 0.058 | 8.168  | 2 | 0.016841528 |
| KIAA1737 | 3 | -0.64  | 0.186 | 0.0005924 | 0.005352549 | 0.094 | 22.007 | 2 | 1.66E-05    |
| PEX5     | 3 | -0.641 | 0.088 | 3.47E-13  | 2.65E-11    | 0.006 | 2.682  | 2 | 0.261557345 |
| AP1M1    | 3 | -0.642 | 0.076 | 1.94E-17  | 3.21E-15    | 0.001 | 2.147  | 2 | 0.341770914 |
| OLIG1    | 3 | -0.645 | 0.132 | 1.06E-06  | 2.16E-05    | 0.033 | 5.521  | 2 | 0.063261974 |
| BIN1     | 3 | -0.647 | 0.145 | 8.58E-06  | 0.00013823  | 0.053 | 13.388 | 2 | 0.00123817  |
| VPREB3   | 3 | -0.649 | 0.165 | 8.37E-05  | 0.00100106  | 0.062 | 8.634  | 2 | 0.013341139 |
| CALM1    | 3 | -0.653 | 0.075 | 4.79E-18  | 8.77E-16    | 0.001 | 2.138  | 2 | 0.343393795 |
| NOV      | 3 | -0.66  | 0.099 | 2.46E-11  | 1.34E-09    | 0.012 | 3.238  | 2 | 0.19806942  |

|          |   |        |       |           |             |       |        |   |             |
|----------|---|--------|-------|-----------|-------------|-------|--------|---|-------------|
| SPTAN1   | 3 | -0.662 | 0.072 | 3.96E-20  | 9.09E-18    | 0     | 2.012  | 2 | 0.365715713 |
| USP11    | 3 | -0.662 | 0.148 | 7.50E-06  | 0.000122738 | 0.046 | 6.901  | 2 | 0.031730154 |
| MCM5     | 3 | -0.663 | 0.145 | 5.13E-06  | 8.74E-05    | 0.044 | 6.69   | 2 | 0.035264604 |
| RBBP7    | 3 | -0.665 | 0.111 | 2.28E-09  | 8.67E-08    | 0.019 | 4      | 2 | 0.13536372  |
| HRK      | 3 | -0.665 | 0.078 | 1.66E-17  | 2.81E-15    | 0.002 | 2.236  | 2 | 0.326998067 |
| IL27RA   | 3 | -0.668 | 0.139 | 1.57E-06  | 3.09E-05    | 0.039 | 6.133  | 2 | 0.04658428  |
| SMARCC1  | 3 | -0.67  | 0.184 | 0.0002773 | 0.002811148 | 0.082 | 10.682 | 2 | 0.004791547 |
| DKC1     | 3 | -0.671 | 0.167 | 5.84E-05  | 0.000736002 | 0.063 | 8.764  | 2 | 0.012501505 |
| PPIA     | 3 | -0.672 | 0.195 | 0.0005621 | 0.005114589 | 0.093 | 11.924 | 2 | 0.002574681 |
| SLC9A3R1 | 3 | -0.674 | 0.186 | 0.0002964 | 0.002977053 | 0.084 | 10.895 | 2 | 0.004307032 |
| CXCR5    | 3 | -0.675 | 0.096 | 1.62E-12  | 1.12E-10    | 0.018 | 5.797  | 2 | 0.055103    |
| EBF1     | 3 | -0.675 | 0.178 | 0.0001489 | 0.001639758 | 0.075 | 9.977  | 2 | 0.006815125 |
| SLAMF1   | 3 | -0.676 | 0.174 | 9.98E-05  | 0.001157273 | 0.07  | 9.483  | 2 | 0.008723683 |
| ACTR1B   | 3 | -0.691 | 0.131 | 1.30E-07  | 3.37E-06    | 0.032 | 5.418  | 2 | 0.066598642 |
| ZNF329   | 3 | -0.692 | 0.072 | 5.42E-22  | 1.57E-19    | 0     | 0.328  | 2 | 0.848938988 |
| MOAP1    | 3 | -0.692 | 0.072 | 5.23E-22  | 1.55E-19    | 0     | 0.643  | 2 | 0.725024483 |
| KLF13    | 3 | -0.697 | 0.198 | 0.0004342 | 0.004108695 | 0.097 | 12.236 | 2 | 0.00220288  |
| STK38    | 3 | -0.697 | 0.119 | 4.16E-09  | 1.51E-07    | 0.023 | 4.51   | 2 | 0.104878303 |
| RBL2     | 3 | -0.7   | 0.135 | 2.17E-07  | 5.36E-06    | 0.035 | 5.752  | 2 | 0.056345857 |
| FCRLA    | 3 | -0.704 | 0.204 | 0.0005429 | 0.004972416 | 0.104 | 12.992 | 2 | 0.001509736 |
| TRIM28   | 3 | -0.705 | 0.176 | 5.97E-05  | 0.000749577 | 0.072 | 9.67   | 2 | 0.007944978 |
| MFGE8    | 3 | -0.712 | 0.078 | 9.27E-20  | 2.07E-17    | 0.002 | 2.233  | 2 | 0.327362543 |
| CD79B    | 3 | -0.713 | 0.12  | 3.10E-09  | 1.16E-07    | 0.037 | 13.645 | 2 | 0.001088759 |
| MARCKSL1 | 3 | -0.713 | 0.072 | 3.75E-23  | 1.28E-20    | 0     | 1.878  | 2 | 0.391031164 |
| COL9A2   | 3 | -0.716 | 0.072 | 2.15E-23  | 7.70E-21    | 0     | 0.307  | 2 | 0.857814779 |
| PRPF8    | 3 | -0.718 | 0.108 | 2.57E-11  | 1.38E-09    | 0.016 | 3.746  | 2 | 0.153695446 |
| PNOC     | 3 | -0.72  | 0.207 | 0.000516  | 0.004761899 | 0.108 | 13.429 | 2 | 0.001213308 |
| RNF44    | 3 | -0.727 | 0.09  | 9.40E-16  | 1.13E-13    | 0.007 | 2.771  | 2 | 0.250251738 |
| SERTAD2  | 3 | -0.731 | 0.072 | 2.93E-24  | 1.16E-21    | 0     | 1.48   | 2 | 0.477176062 |
| CABIN1   | 3 | -0.734 | 0.142 | 2.45E-07  | 5.98E-06    | 0.041 | 6.344  | 2 | 0.041930144 |

|          |   |        |       |           |             |       |        |   |             |
|----------|---|--------|-------|-----------|-------------|-------|--------|---|-------------|
| P2RY10   | 3 | -0.734 | 0.148 | 7.38E-07  | 1.57E-05    | 0.056 | 13.759 | 2 | 0.001028624 |
| NELL2    | 3 | -0.736 | 0.2   | 0.0002254 | 0.00234877  | 0.099 | 12.42  | 2 | 0.002009736 |
| EML4     | 3 | -0.736 | 0.228 | 0.0012195 | 0.00971643  | 0.135 | 16.167 | 2 | 0.000308558 |
| SYTL1    | 3 | -0.739 | 0.111 | 2.37E-11  | 1.30E-09    | 0.018 | 3.934  | 2 | 0.139847946 |
| PFAS     | 3 | -0.739 | 0.147 | 4.80E-07  | 1.08E-05    | 0.045 | 6.759  | 2 | 0.034065856 |
| KIAA0355 | 3 | -0.74  | 0.072 | 9.44E-25  | 3.92E-22    | 0     | 0.644  | 2 | 0.724665277 |
| BANK1    | 3 | -0.742 | 0.213 | 0.0005011 | 0.004653322 | 0.115 | 14.155 | 2 | 0.000843776 |
| TBC1D10C | 3 | -0.742 | 0.074 | 1.83E-23  | 6.69E-21    | 0.001 | 2.082  | 2 | 0.35317039  |
| CACNA2D3 | 3 | -0.748 | 0.123 | 1.18E-09  | 4.78E-08    | 0.026 | 4.794  | 2 | 0.090969012 |
| PITPNC1  | 3 | -0.752 | 0.198 | 0.0001516 | 0.001663865 | 0.108 | 24.529 | 2 | 4.72E-06    |
| CA5B     | 3 | -0.753 | 0.126 | 2.48E-09  | 9.35E-08    | 0.029 | 5.042  | 2 | 0.080392388 |
| FLNB     | 3 | -0.757 | 0.163 | 3.51E-06  | 6.25E-05    | 0.06  | 8.295  | 2 | 0.01580117  |
| ID3      | 3 | -0.768 | 0.134 | 1.14E-08  | 3.71E-07    | 0.035 | 5.679  | 2 | 0.058453652 |
| EPHA4    | 3 | -0.772 | 0.072 | 1.04E-26  | 5.36E-24    | 0     | 1.335  | 2 | 0.513032857 |
| TATDN2   | 3 | -0.781 | 0.226 | 0.0005524 | 0.005044102 | 0.133 | 15.848 | 2 | 0.000361953 |
| ZNF518B  | 3 | -0.789 | 0.222 | 0.0003791 | 0.003687358 | 0.127 | 15.276 | 2 | 0.000481785 |
| GPX7     | 3 | -0.797 | 0.221 | 0.0003113 | 0.003102844 | 0.126 | 15.104 | 2 | 0.000525157 |
| MAP7     | 3 | -0.799 | 0.127 | 3.57E-10  | 1.62E-08    | 0.038 | 10.078 | 2 | 0.006481724 |
| BLK      | 3 | -0.804 | 0.159 | 4.27E-07  | 9.73E-06    | 0.056 | 7.829  | 2 | 0.019953393 |
| DBP      | 3 | -0.815 | 0.197 | 3.37E-05  | 0.000453602 | 0.095 | 11.928 | 2 | 0.002569768 |
| OSBPL10  | 3 | -0.817 | 0.165 | 7.45E-07  | 1.58E-05    | 0.061 | 8.418  | 2 | 0.014864833 |
| FAIM3    | 3 | -0.818 | 0.19  | 1.58E-05  | 0.000237263 | 0.087 | 11.088 | 2 | 0.003911241 |
| SESN1    | 3 | -0.851 | 0.236 | 0.0003109 | 0.003100158 | 0.146 | 17.1   | 2 | 0.000193508 |
| MEF2D    | 3 | -0.861 | 0.162 | 1.15E-07  | 3.01E-06    | 0.058 | 8.051  | 2 | 0.017852313 |
| KLF2     | 3 | -0.881 | 0.073 | 1.05E-33  | 1.47E-30    | 0     | 1.369  | 2 | 0.504444863 |
| ITPKB    | 3 | -0.884 | 0.112 | 2.93E-15  | 3.20E-13    | 0.019 | 3.945  | 2 | 0.139101418 |
| GNG7     | 3 | -0.907 | 0.108 | 5.38E-17  | 7.88E-15    | 0.016 | 3.697  | 2 | 0.157440503 |
| FOXO1    | 3 | -0.951 | 0.214 | 9.19E-06  | 0.000147144 | 0.117 | 13.894 | 2 | 0.000961316 |
| ARHGEF18 | 3 | -1.027 | 0.235 | 1.23E-05  | 0.000190028 | 0.144 | 16.444 | 2 | 0.000268628 |

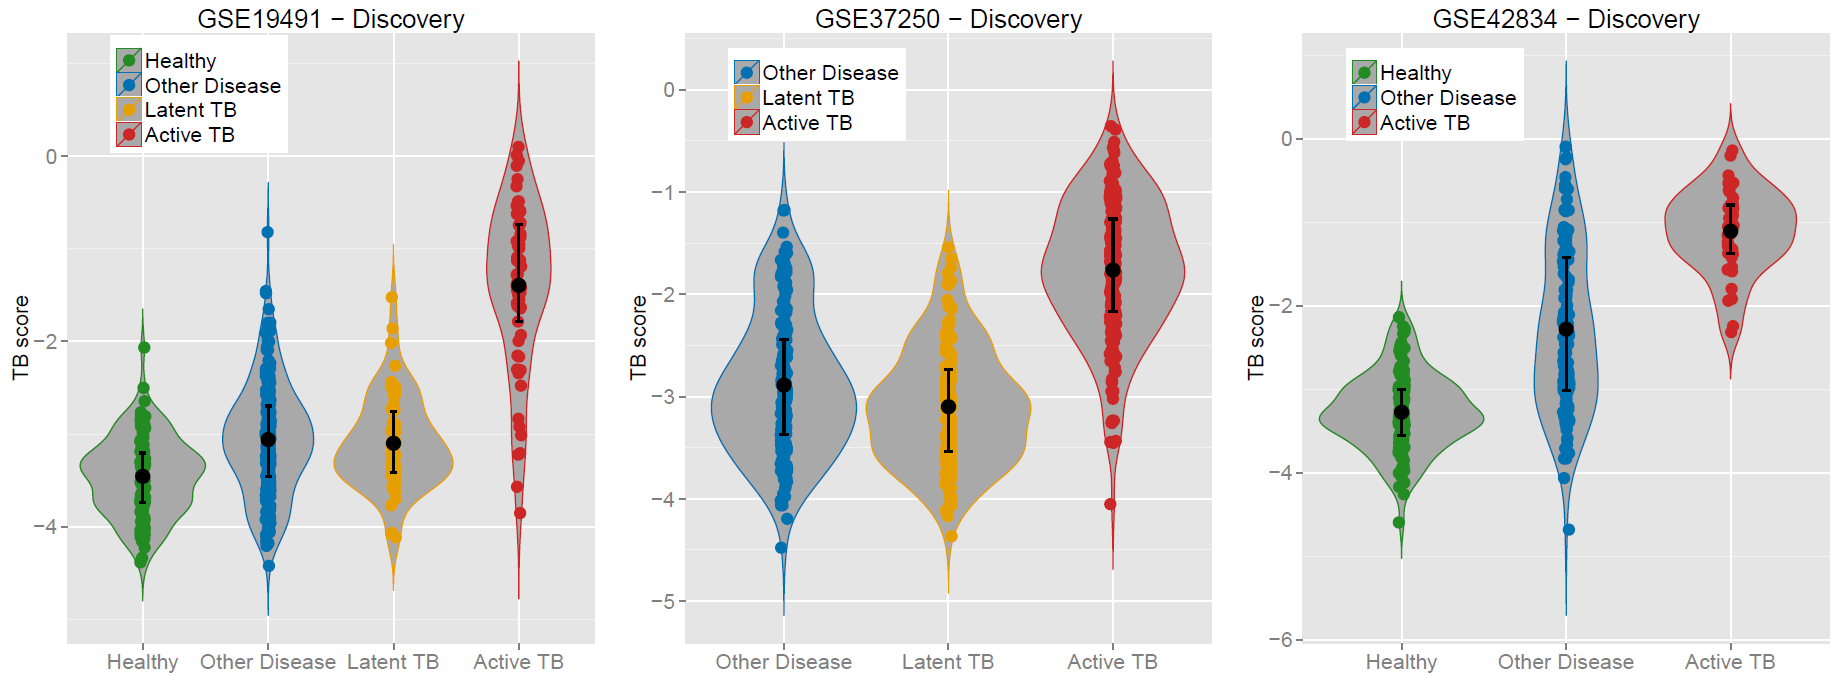

Appendix page 3. Performance of the three-gene set in the discovery datasets. (a-c) Violin plots of GSE19491, GSE32750, and GSE42834, respectively; all comparisons to ATB significant (Wilcoxon  $p < 1e-10$ ). Healthy patients were not included in multi-cohort analysis but are shown here.

| <b>Discovery - HC vs. ATB</b>  |             |             |       |       |          |
|--------------------------------|-------------|-------------|-------|-------|----------|
| Dataset                        | sensitivity | specificity | PPV   | NPV   | accuracy |
| GSE19491                       | 0.885       | 0.966       | 0.931 | 0.942 | 0.938    |
| GSE42834                       | 0.975       | 0.983       | 0.951 | 0.991 | 0.981    |
|                                |             |             |       |       |          |
| <b>Discovery - LTB vs. ATB</b> |             |             |       |       |          |
| Dataset                        | sensitivity | specificity | PPV   | NPV   | accuracy |
| GSE19491                       | 0.885       | 0.87        | 0.857 | 0.896 | 0.877    |
| GSE37250                       | 0.872       | 0.832       | 0.859 | 0.848 | 0.854    |
|                                |             |             |       |       |          |
| <b>Discovery - OD vs. ATB</b>  |             |             |       |       |          |
| Dataset                        | sensitivity | specificity | PPV   | NPV   | accuracy |
| GSE19491                       | 0.869       | 0.855       | 0.654 | 0.954 | 0.858    |
| GSE37250                       | 0.805       | 0.789       | 0.809 | 0.784 | 0.797    |
| GSE42834                       | 0.8         | 0.732       | 0.492 | 0.918 | 0.748    |

Appendix page 4. Test parameters at an automated threshold (maximum sensitivity + specificity) in the discovery datasets. The threshold for each dataset was calculated separately, and then test statistics were generated from the resulting patient classifications. PPV, positive predictive value, NPV, negative predictive value.

GSE19491 – Discovery

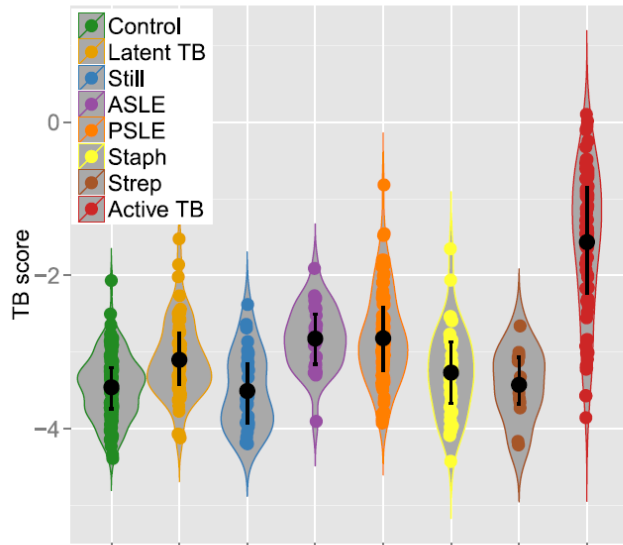

GSE19491 – Discovery

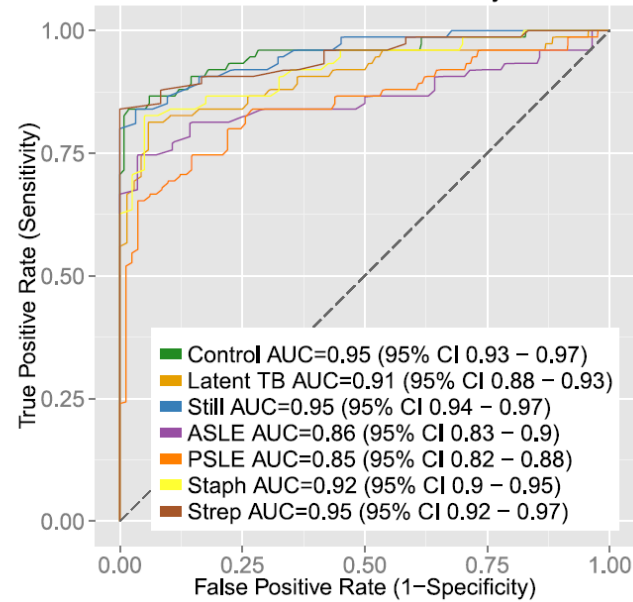

GSE42834 – Discovery

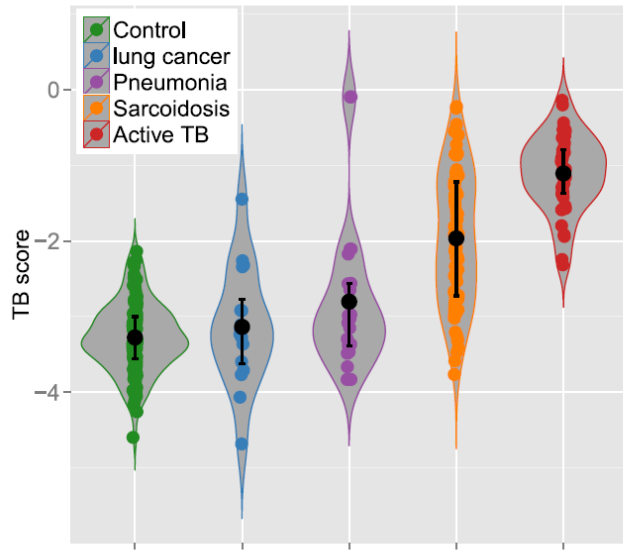

GSE42834 – Discovery

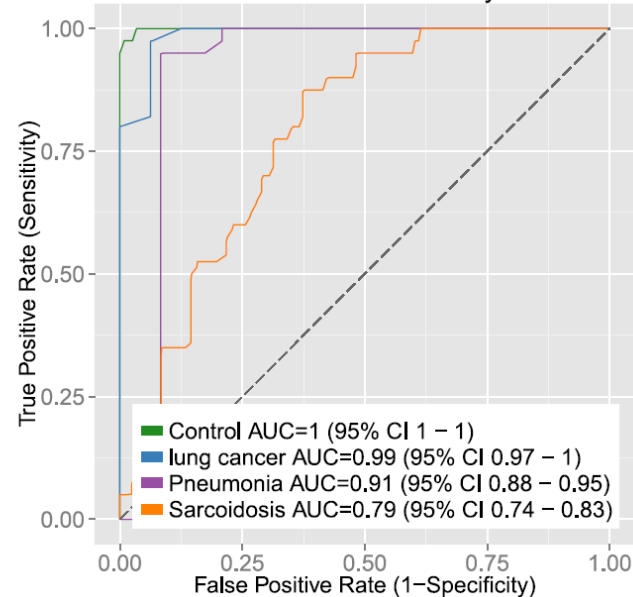

Appendix page 5. Breakdown of ‘Other Disease’ category by disease type in the discovery datasets for which this information is supplied.

GSE28623

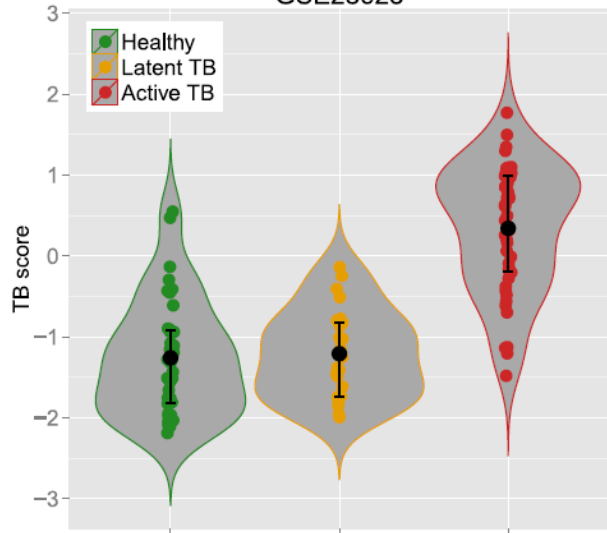

GSE34608

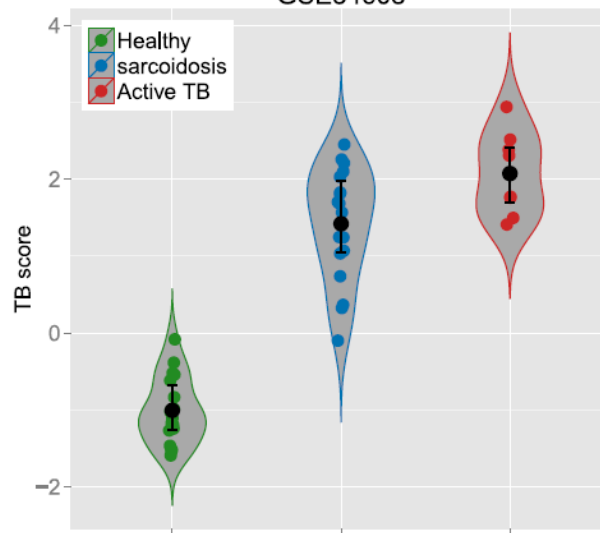

GSE39940

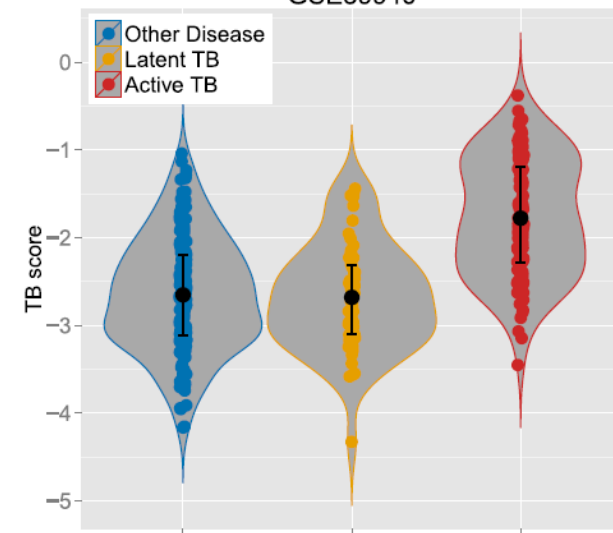

GSE39939

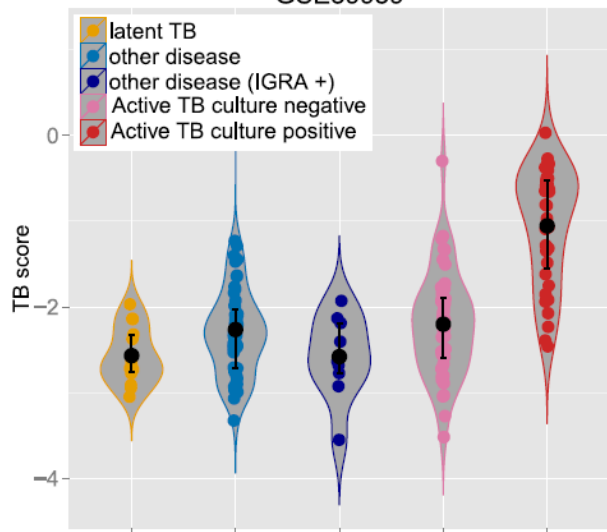

GSE41055

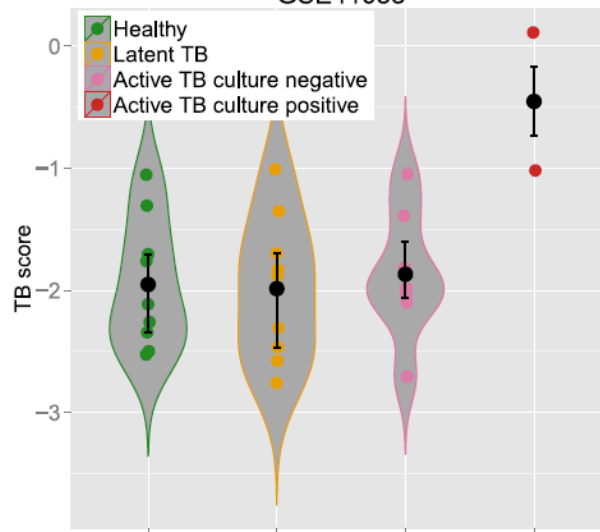

Appendix page 6. Violin plots of validation datasets not shown in Figure 6.

| <b>Validation - HC vs. ATB</b>  |                    |                    |            |            |                 |
|---------------------------------|--------------------|--------------------|------------|------------|-----------------|
| <b>Dataset</b>                  | <b>sensitivity</b> | <b>specificity</b> | <b>PPV</b> | <b>NPV</b> | <b>accuracy</b> |
| GSE28623                        | 0.848              | 0.811              | 0.848      | 0.811      | 0.831           |
| GSE34608                        | 1                  | 1                  | 1          | 1          | 1               |
| GSE41055 (children)             | 1                  | 0.778              | 0.5        | 1          | 0.818           |
| GSE56153                        | 0.611              | 0.667              | 0.647      | 0.632      | 0.639           |
| <b>Validation - LTB vs. ATB</b> |                    |                    |            |            |                 |
| <b>Dataset</b>                  | <b>sensitivity</b> | <b>specificity</b> | <b>PPV</b> | <b>NPV</b> | <b>accuracy</b> |
| GSE28623                        | 0.87               | 0.84               | 0.909      | 0.778      | 0.859           |
| GSE39939 (children)             | 0.886              | 0.929              | 0.969      | 0.765      | 0.898           |
| GSE39940 (children)             | 0.712              | 0.759              | 0.859      | 0.562      | 0.727           |
| GSE41055 (children)             | 1                  | 0.889              | 0.667      | 1          | 0.909           |
| <b>Validation - OD vs. ATB</b>  |                    |                    |            |            |                 |
| <b>Dataset</b>                  | <b>sensitivity</b> | <b>specificity</b> | <b>PPV</b> | <b>NPV</b> | <b>accuracy</b> |
| GSE34608                        | 0.5                | 0.611              | 0.364      | 0.733      | 0.577           |
| GSE39939 (children)             | 0.771              | 0.875              | 0.771      | 0.875      | 0.838           |
| GSE39940 (children)             | 0.685              | 0.74               | 0.633      | 0.781      | 0.718           |

Appendix page 7. Test parameters at an automated threshold (maximum sensitivity + specificity) in the validation datasets. The threshold for each dataset was calculated separately, and then test statistics were generated from the resulting patient classifications. PPV, positive predictive value, NPV, negative predictive value.



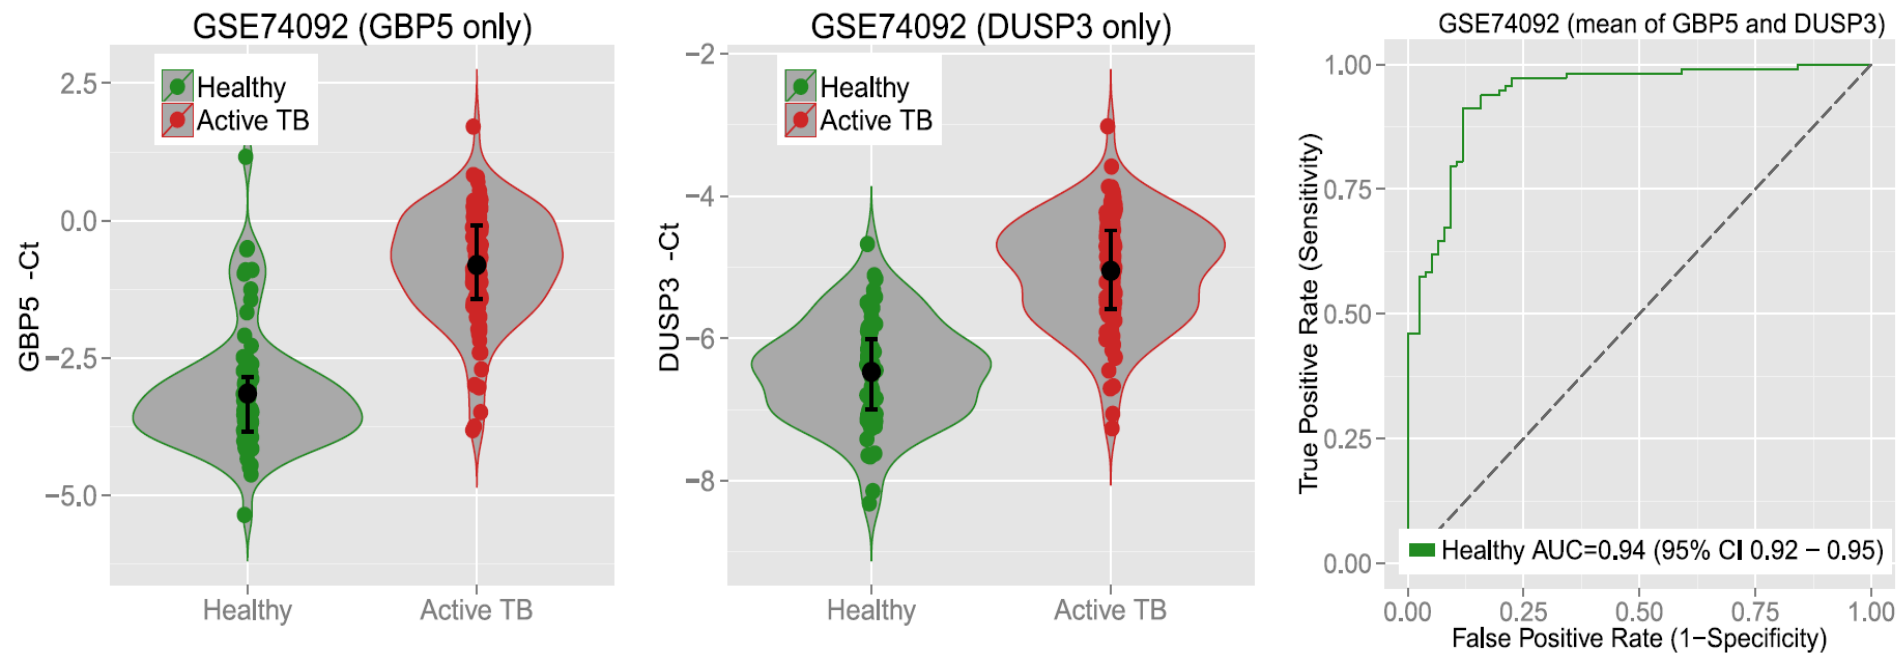

Appendix page 8. Performance of *GBP5* and *DUSP3* in the RT-PCR data from GSE74092 (*KLF2* is not present in these data). The TB score from which the ROC is calculated is simply the mean of *GBP5* and *DUSP3*, as *KLF2* is not present.

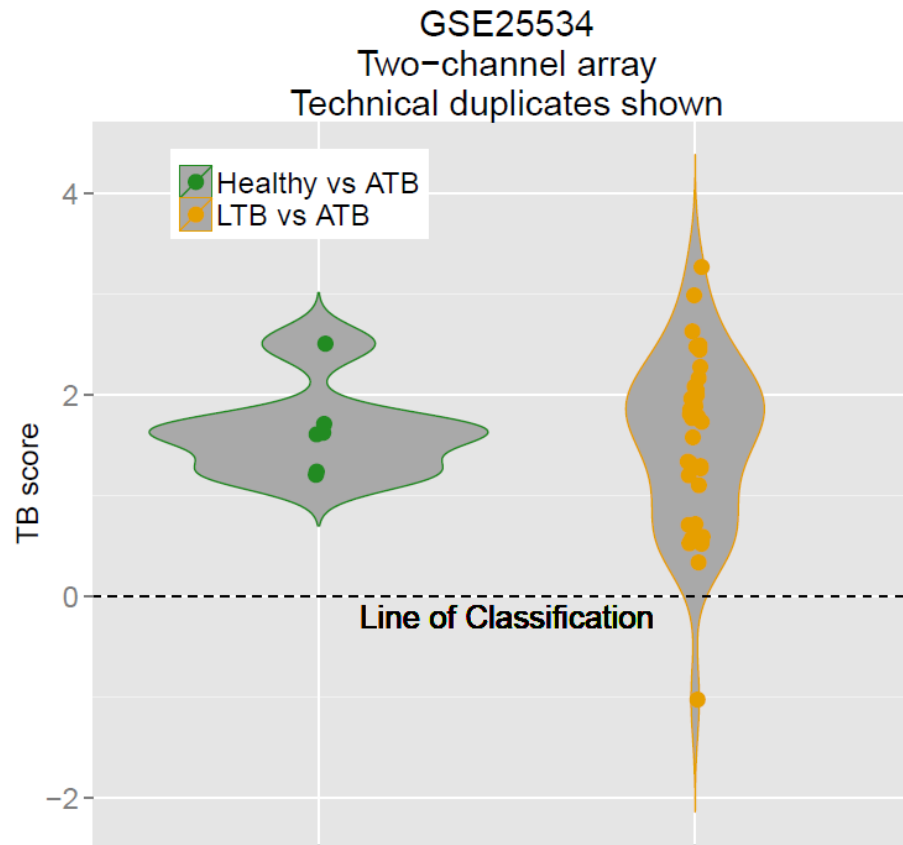

Appendix page 9. TB score in GSE25534, which utilized a two-channel array, wherein gene expression values represent relative values between the two samples on the array. Here, a positive TB score means that the TB score was greater in the ATB sample on the array than the control (healthy or LTB) sample on the array. A positive TB score for a given array would thus correctly classify that ATB sample vs. that control sample. The violin plots thus indicate that all but one sample are correctly classified by the three-gene set. As with other two-channel array studies, GSE25534 contains technical duplicates, which are shown here.

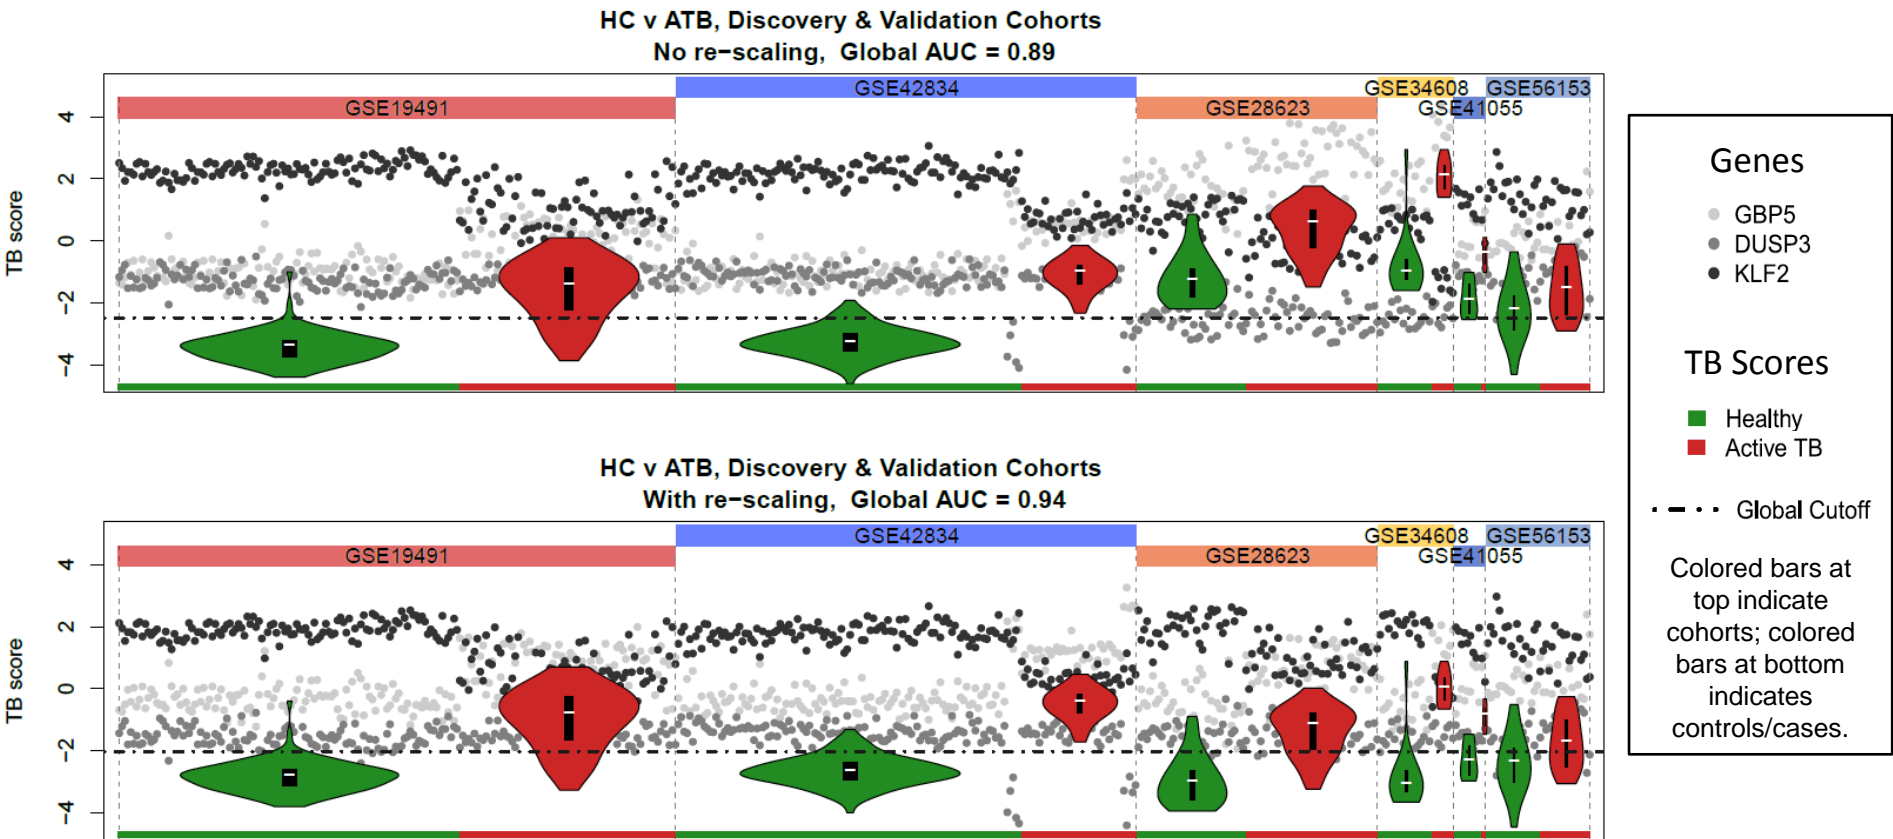

Appendix page 10. Establishing a single global test cutoff in the joint discovery and validation datasets for HC vs ATB. Shown are sample-level normalized gene scores, along with group TB score distributions. (A) genes have not been re-centered to their global mean. (B) Genes have been re-centering to their global mean by subtracting the difference between the dataset mean and the global mean for each gene. Note that between (A) and (B), each gene maintains its distribution within a dataset.

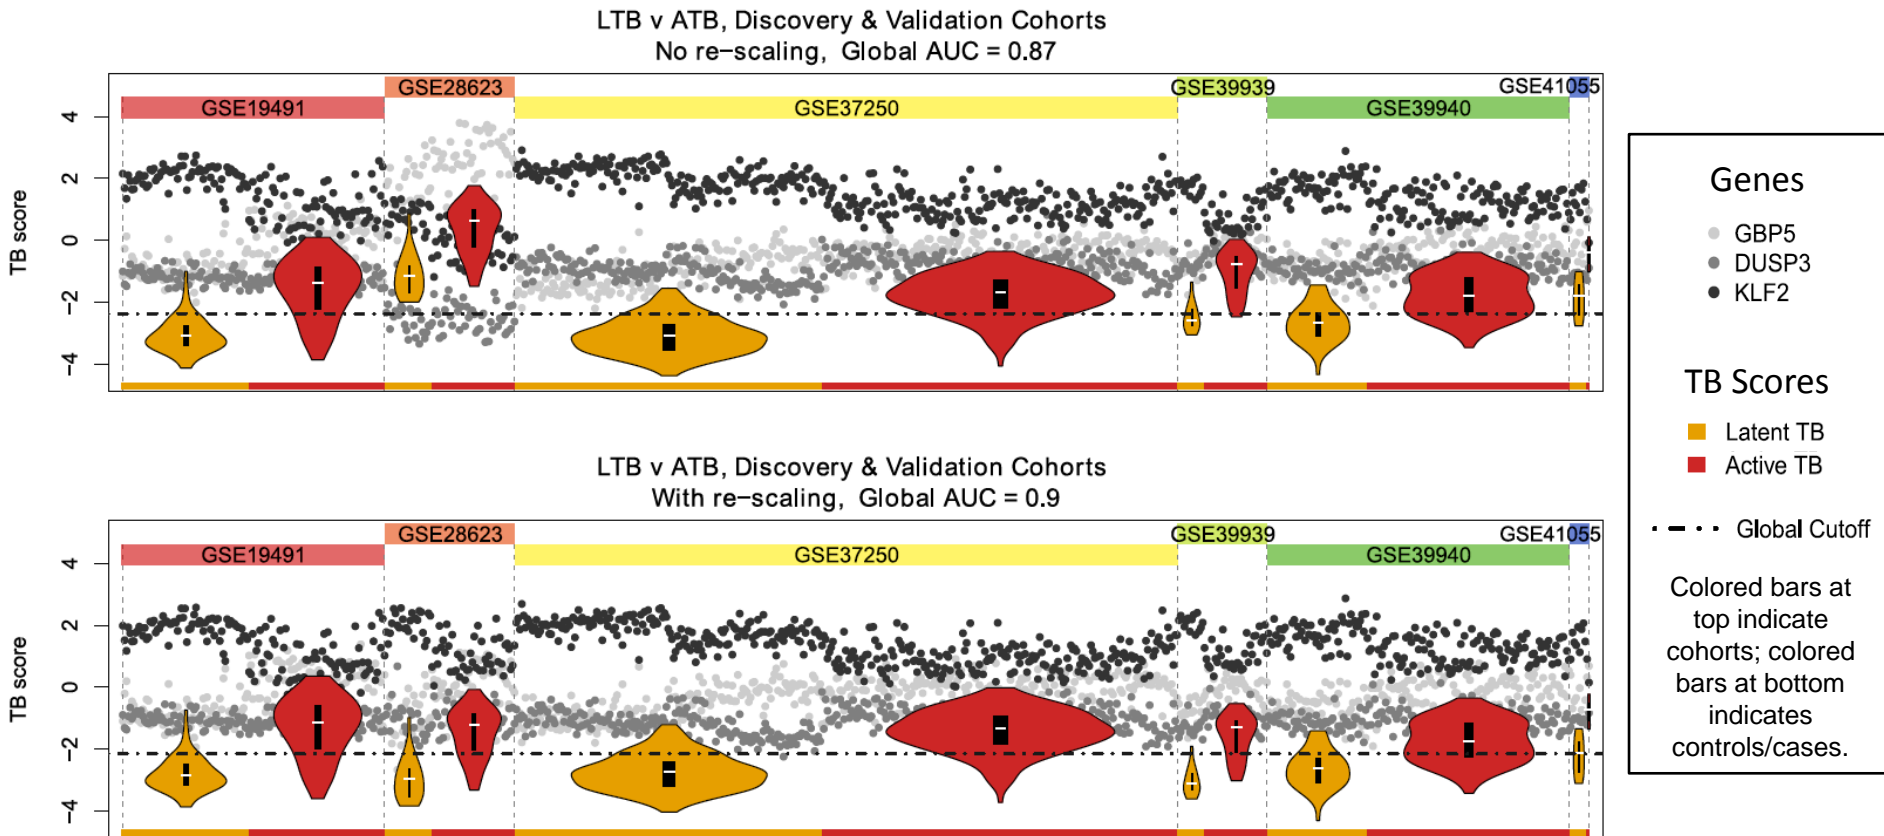

Appendix page 11. Establishing a single global test cutoff in the joint discovery and validation datasets for LTB vs ATB. Shown are sample-level normalized gene scores, along with group TB score distributions. (A) genes have not been re-centered to their global mean. (B) Genes have been re-centering to their global mean by subtracting the difference between the dataset mean and the global mean for each gene. Note that between (A) and (B), each gene maintains its distribution within a dataset.

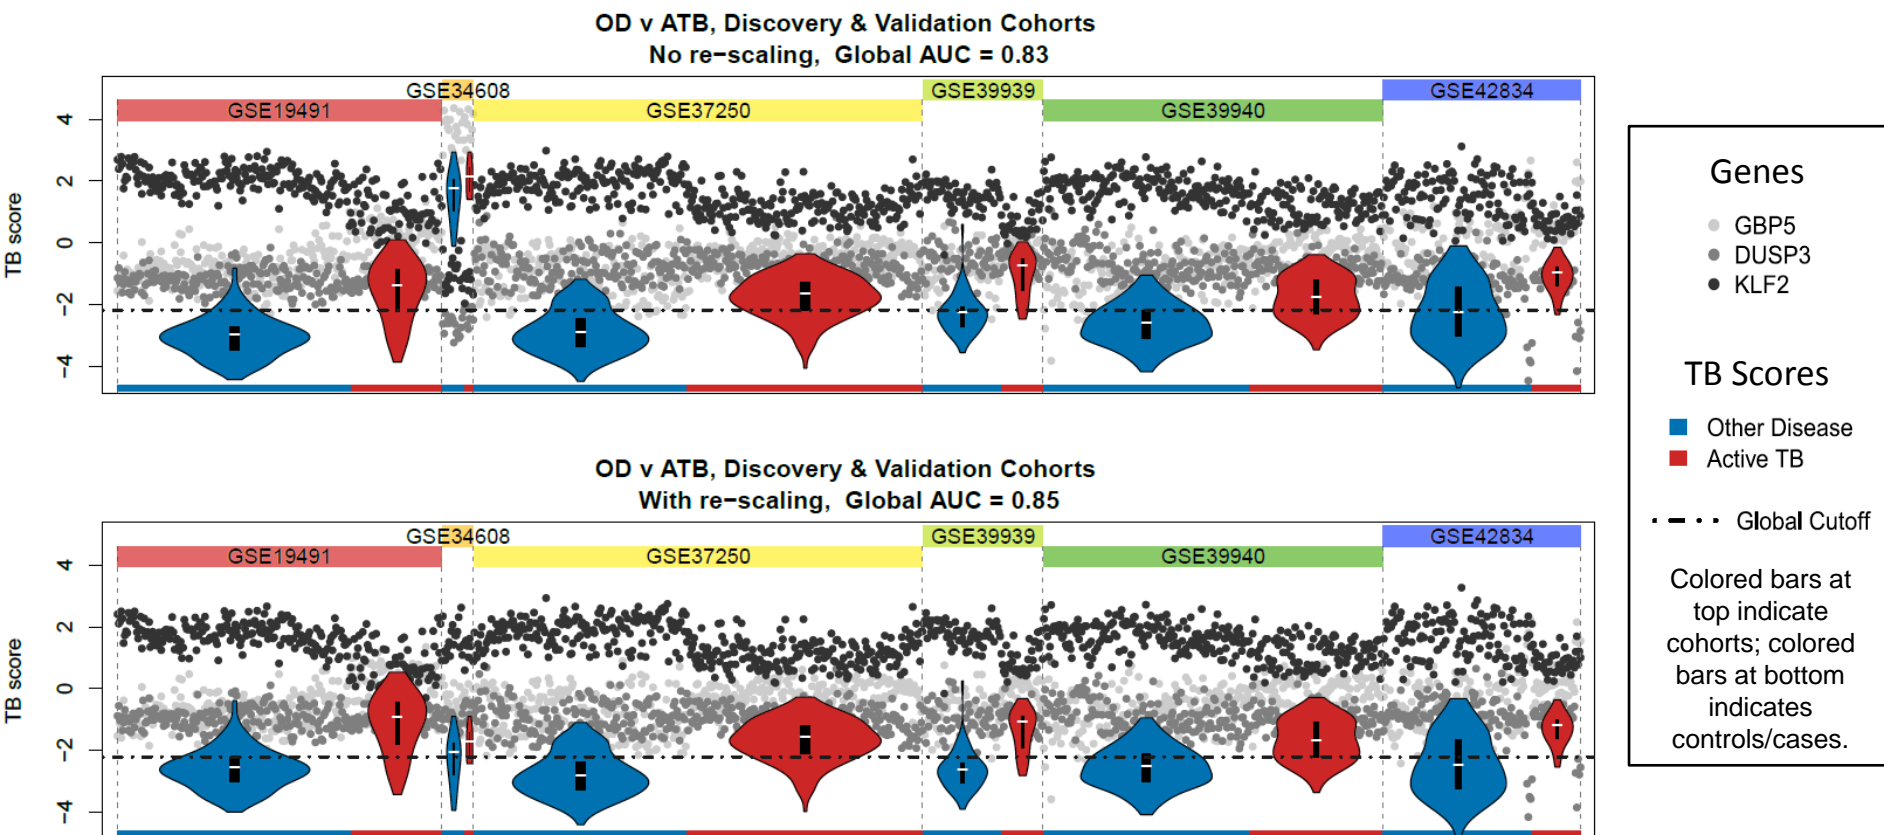

Appendix page 12. Establishing a single global test cutoff in the joint discovery and validation datasets for OD vs ATB. Shown are sample-level normalized gene scores, along with group TB score distributions. (A) genes have not been re-centered to their global mean. (B) Genes have been re-centering to their global mean by subtracting the difference between the dataset mean and the global mean for each gene. Note that between (A) and (B), each gene maintains its distribution within a dataset.

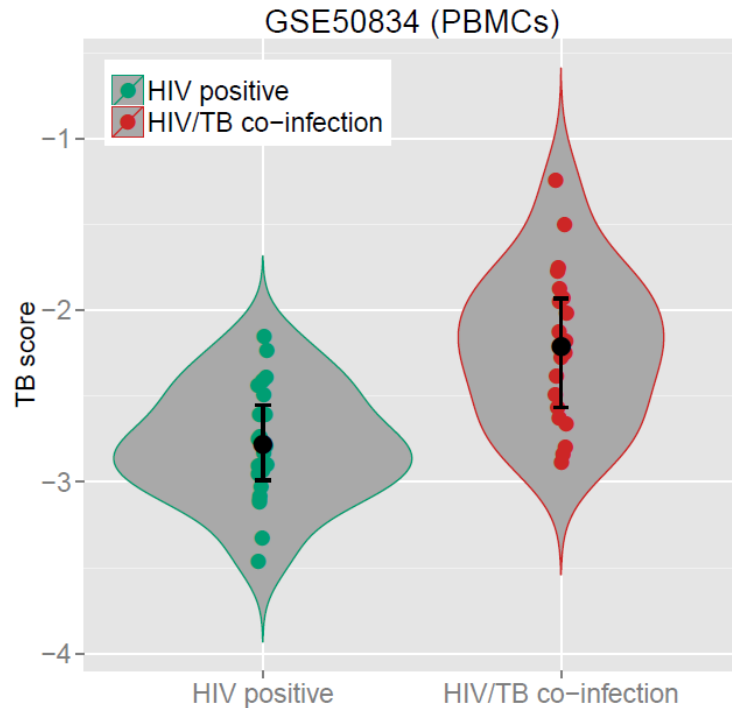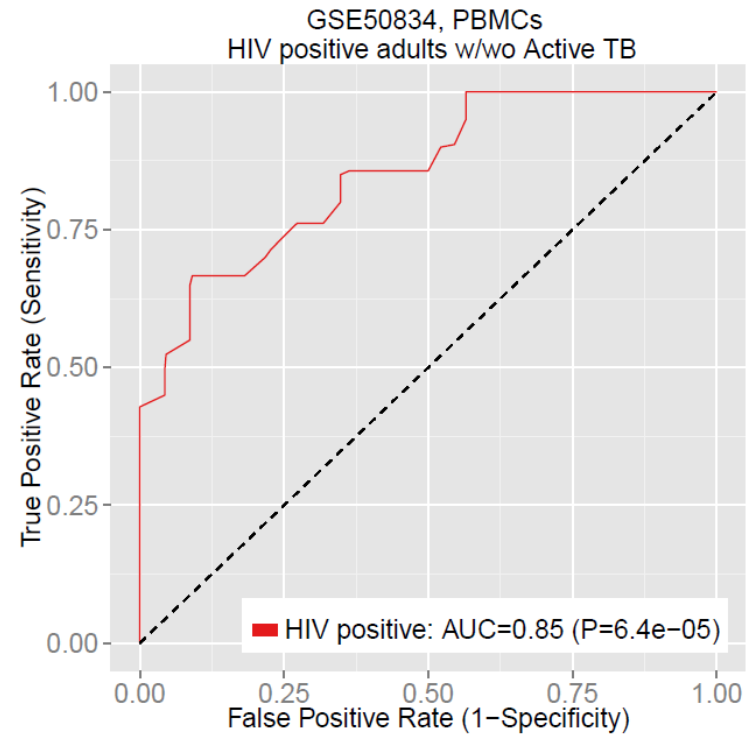

Appendix page 13. GSE50834 compared PBMCs in HIV-positive patients to those with HIV/TB co-infection. (A) The three gene set showed a significant difference between the two groups, with (B) an ROC AUC of 0.85.

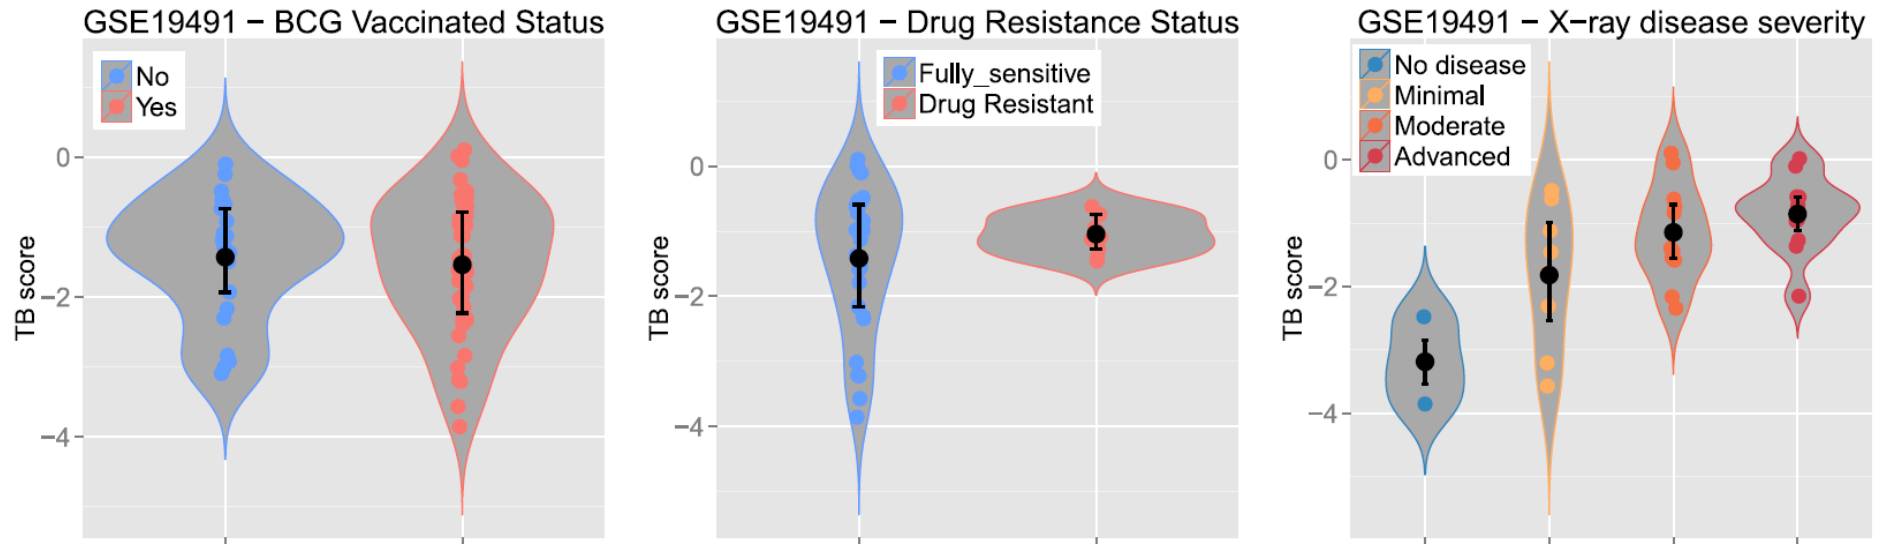

Appendix page 14. In dataset GSE19491, TB score was not affected by either (a) BCG vaccination status or (b) TB drug resistance status (both Wilcoxon  $p=NS$ ), but (c) increased with X-ray disease severity (JT-test  $p<0.01$ ).

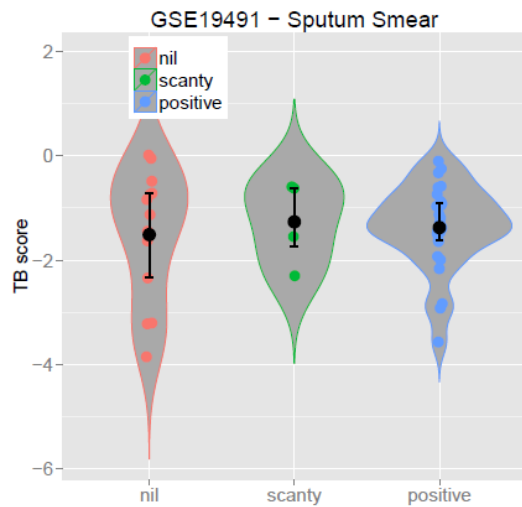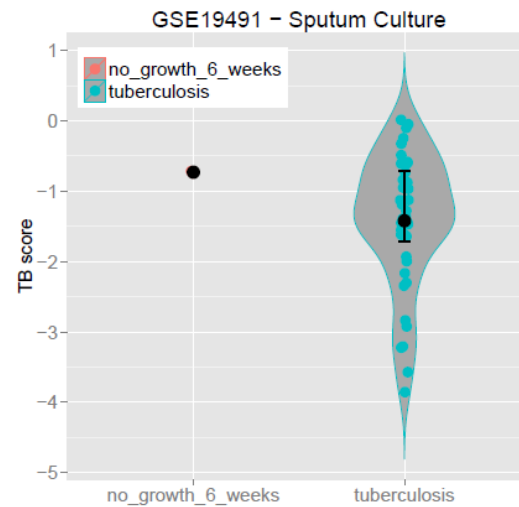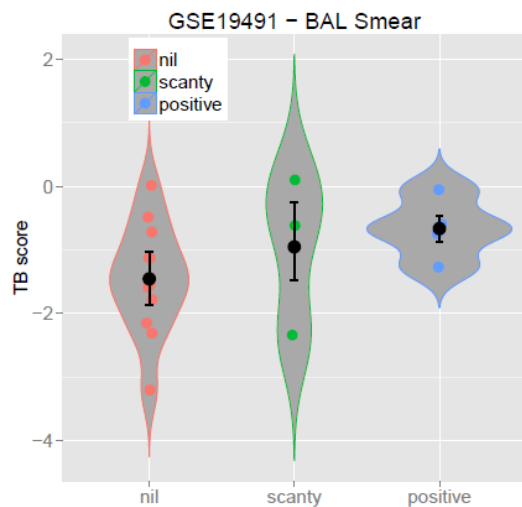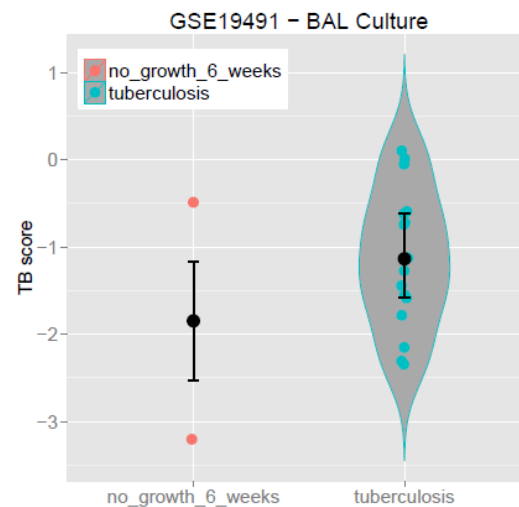

Appendix page 15. TB score in ATB patients in GSE19491 according to (A,B) sputum and (C,D) BAL smear and culture results. There are many patients overlapping between the different figures; no ATB patients had both negative sputum culture and negative BAL culture. There is no significant effect of smear or culture positivity between in any group (Wilcoxon  $p=NS$ ).



| <b>Cliff Combined</b>                                     |          |            |                            |          |
|-----------------------------------------------------------|----------|------------|----------------------------|----------|
|                                                           | Estimate | Std. Error | t value                    | p value  |
| (Intercept)                                               | 1.691    | 0.082      | 20.698                     | < 2e-16  |
| <b>time.weeks</b>                                         | -0.044   | 0.006      | -6.812                     | 2.14E-10 |
| Residual standard error: 0.826 on 151 degrees of freedom  |          |            | Multiple R-squared: 0.2351 |          |
| <b>GSE40553</b>                                           |          |            |                            |          |
|                                                           | Estimate | Std. Error | t value                    | p value  |
| (Intercept)                                               | -1.569   | 0.082      | -19.11                     | <2e-16   |
| <b>time.weeks</b>                                         | -0.035   | 0.003      | -10.68                     | <2e-16   |
| Residual standard error: 0.7834 on 164 degrees of freedom |          |            | Multiple R-squared: 0.4101 |          |
| <b>GSE56153</b>                                           |          |            |                            |          |
|                                                           | Estimate | Std. Error | t value                    | p value  |
| (Intercept)                                               | -1.668   | 0.158      | -10.569                    | 1.89E-14 |
| <b>time.weeks</b>                                         | -0.025   | 0.009      | -2.785                     | 7.49E-03 |
| Residual standard error: 0.7923 on 51 degrees of freedom  |          |            | Multiple R-squared: 0.132  |          |
| <b>GSE62147</b>                                           |          |            |                            |          |
|                                                           | Estimate | Std. Error | t value                    | p value  |
| (Intercept)                                               | -0.065   | 0.105      | -0.621                     | 5.37E-01 |
| <b>time.weeks</b>                                         | -0.052   | 0.006      | -9.058                     | 4.03E-12 |
| Residual standard error: 0.5333 on 50 degrees of freedom  |          |            | Multiple R-squared: 0.6213 |          |

Appendix page 16. Linear regressions of TB score on treatment time in weeks. All four datasets show significant decreases over time.

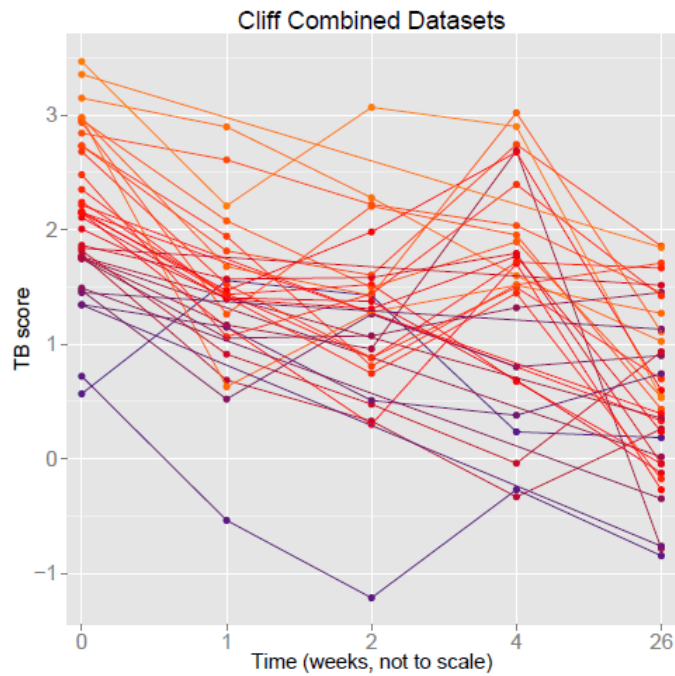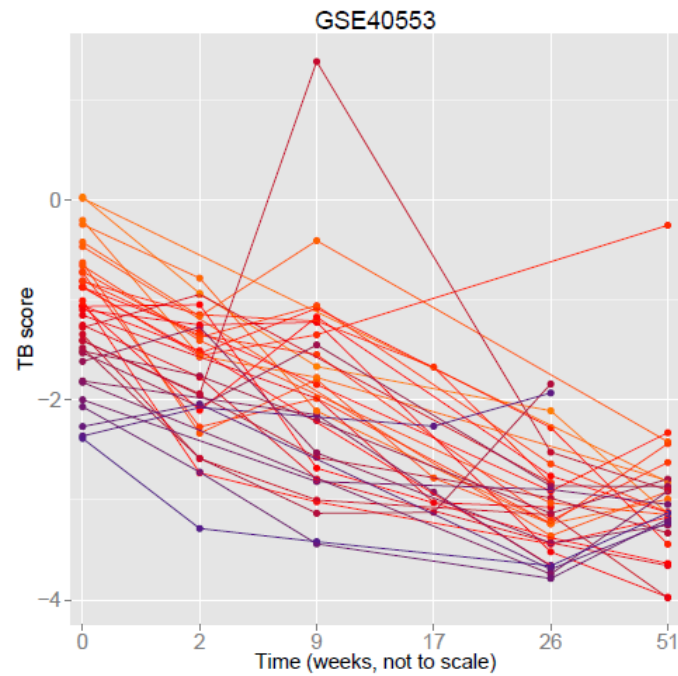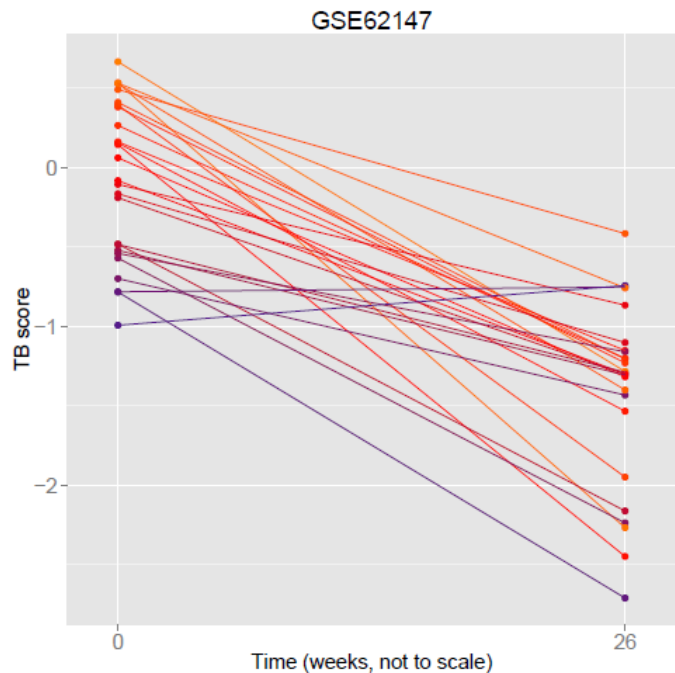

Appendix page 17. Individual ATB patient trajectories of TB score for datasets that track patients longitudinally during treatment. Each patient is colored according to TB score rank at time of diagnosis (0 weeks). Time is not drawn to scale.

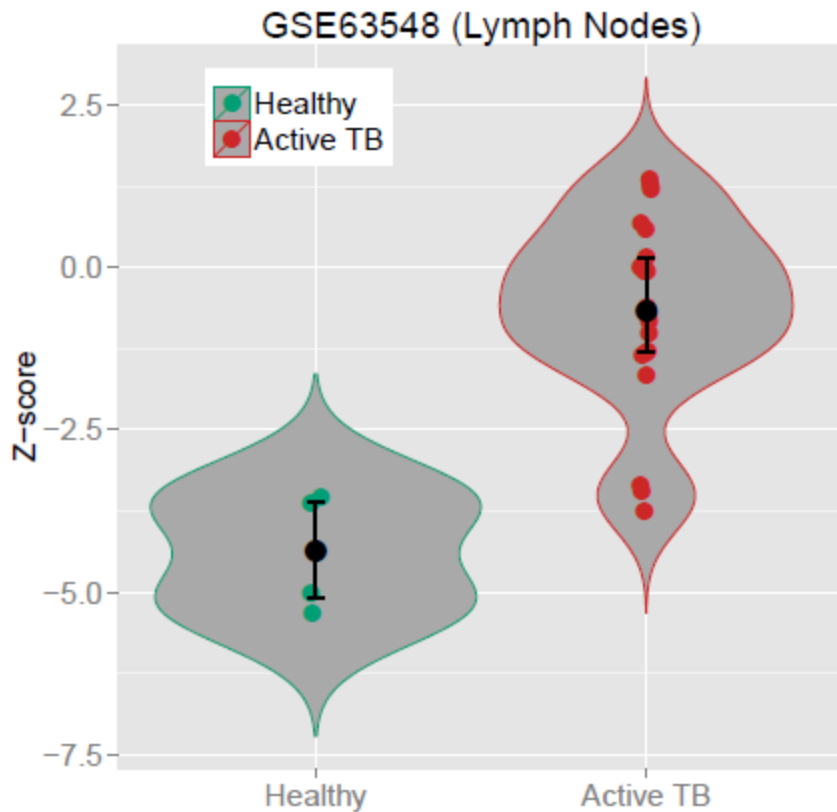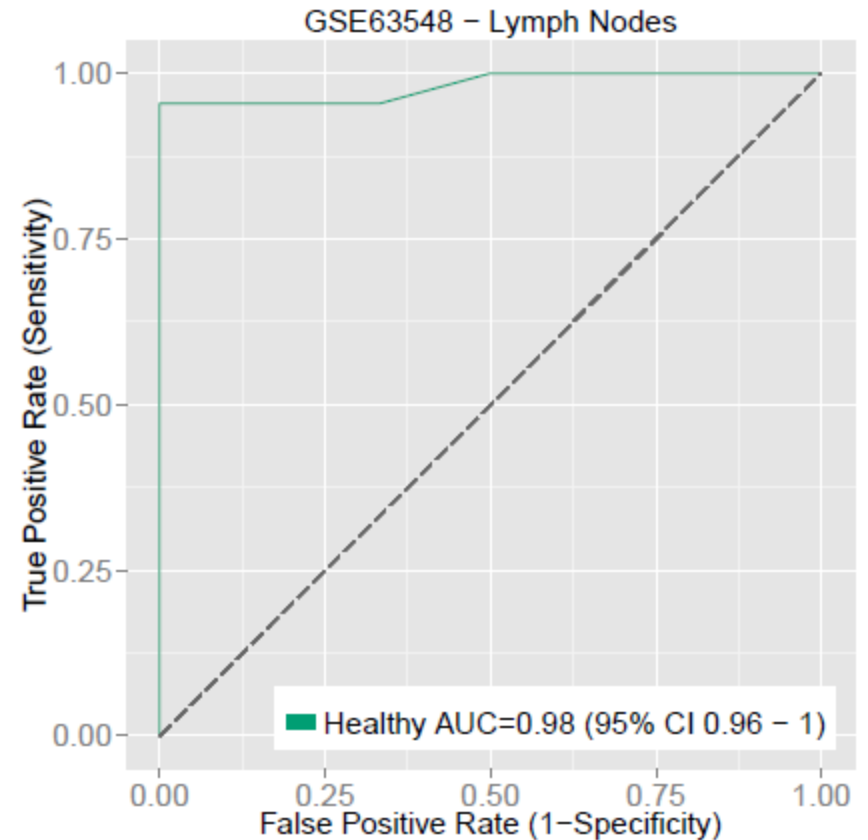

Appendix page 18. GSE63548 compared lymph node tissue between healthy controls and patients with extrapulmonary lymph node TB infections. The three gene set showed (A) a significant difference between the two groups, with (B) an ROC AUC of 0.98.

| Manuscript                        | Discovery Dataset                  | Discovery Comparison & Gene Sets               | Model Type              |
|-----------------------------------|------------------------------------|------------------------------------------------|-------------------------|
| Anderson et al.                   | GSE39940                           | LTB vs ATB - 41 genes<br>OD vs ATB - 51 genes  | Difference of means     |
| Berry et al.                      | GSE19491                           | LTB vs ATB – 393 genes<br>OD vs ATB – 86 genes | K-nearest neighbors     |
| Bloom et al.                      | GES42834                           | OD vs ATB – 144 transcripts                    | Support vector machines |
| Kaforou et al.                    | GSE37250                           | LTB vs ATB – 27 genes<br>OD vs ATB – 44 genes  | Difference of means     |
| Verhagen et al.                   | GSE41055                           | HC & LTB vs ATB - 10 genes                     | Random Forests          |
| Sweeney et al.<br>(present study) | GSE19491,<br>GSE37250,<br>GSE42834 | OD & LTB vs ATB – 3 genes                      | Difference of means     |

Appendix page 19. An overview of previous proposed host-response diagnostic gene sets discovered in microarray studies.

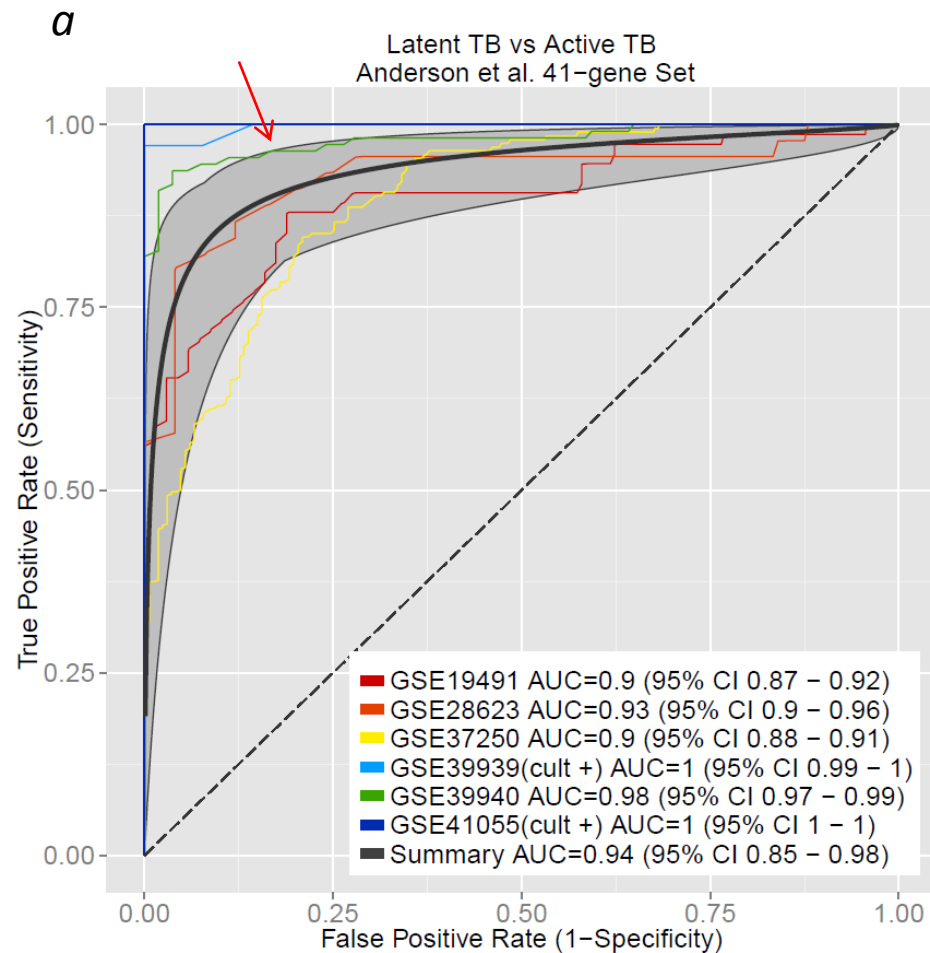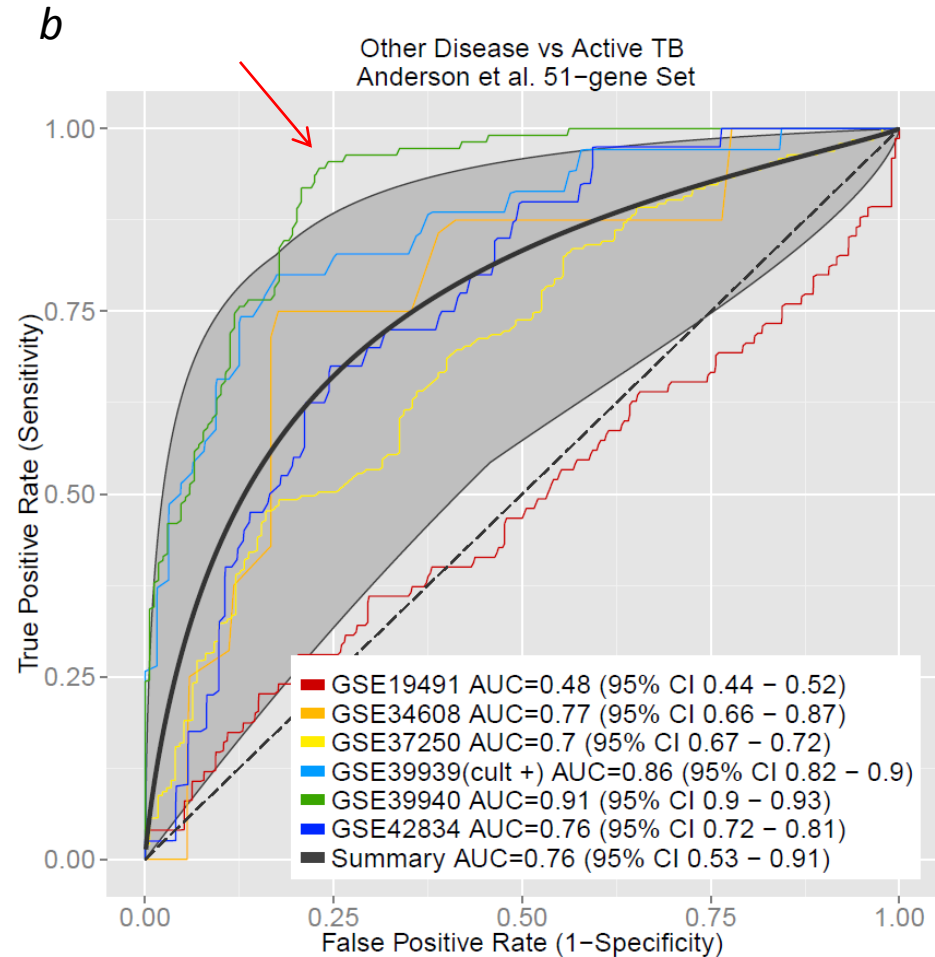

Appendix page 20. Summary ROC plots for the Anderson et al. diagnostic gene sets in all publically available TB gene expression datasets. The red arrows mark the discovery dataset (GSE39940). (a) Latent TB versus active TB; (b) other disease versus active TB. The gene sets were tested with the difference of arithmetic means as in the original paper.

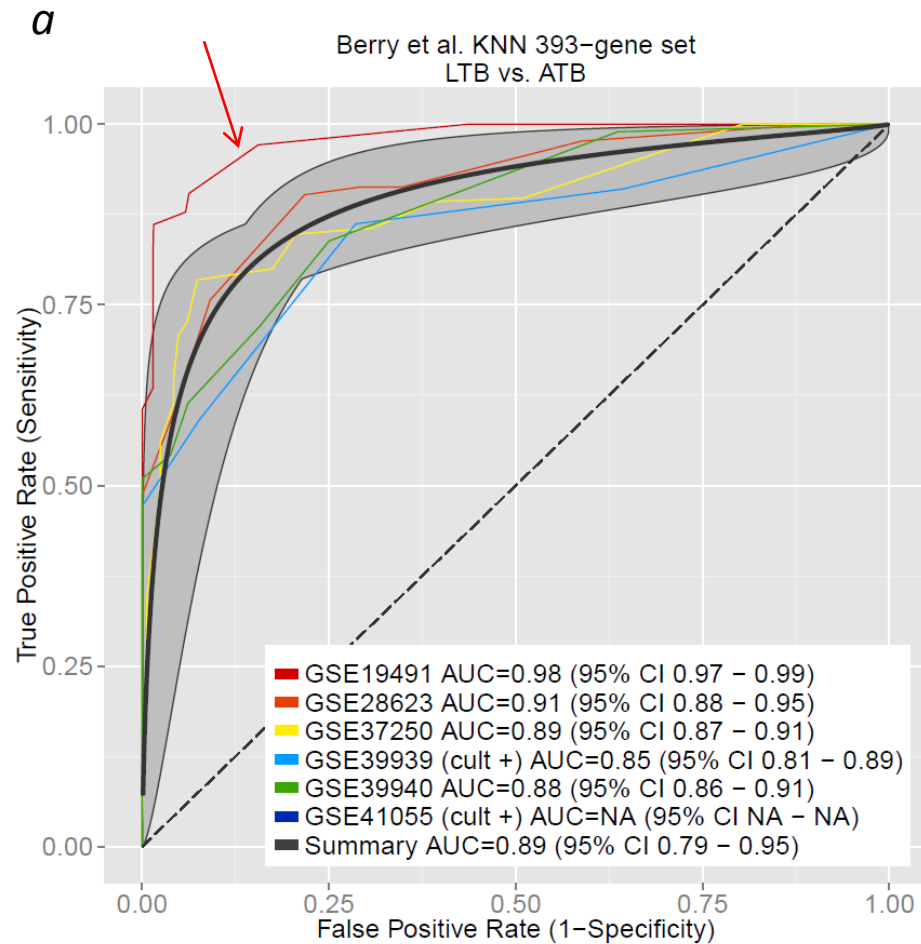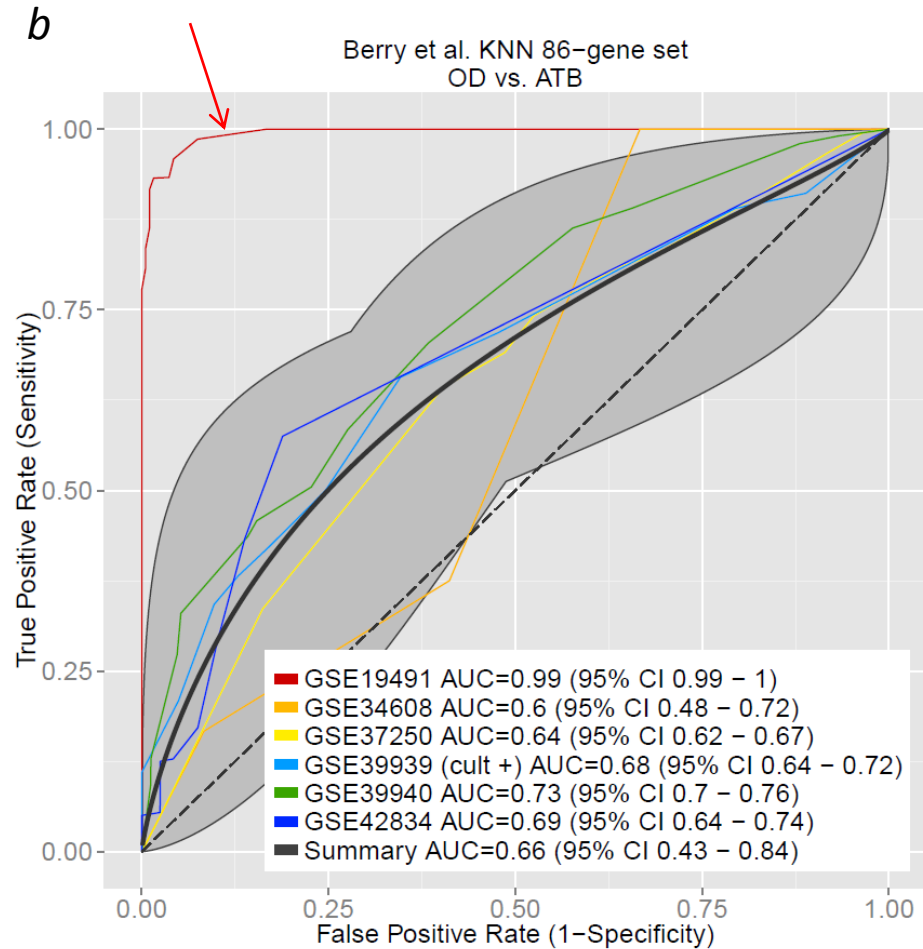

Appendix page 21. Summary ROC plots for the Berry et al. diagnostic gene set in all publically available TB gene expression datasets. The red arrow marks the discovery dataset (GSE19491) (a) Latent TB versus active TB; (b) other disease versus active TB. Each dataset was tested using a K-nearest neighbors classifier built in GSE19491, as in the original paper. ROC curves were built from vote-count thresholds. GSE41055 is listed as 'NA' because all votes assigned both classes as LTB, so no thresholding could be done.

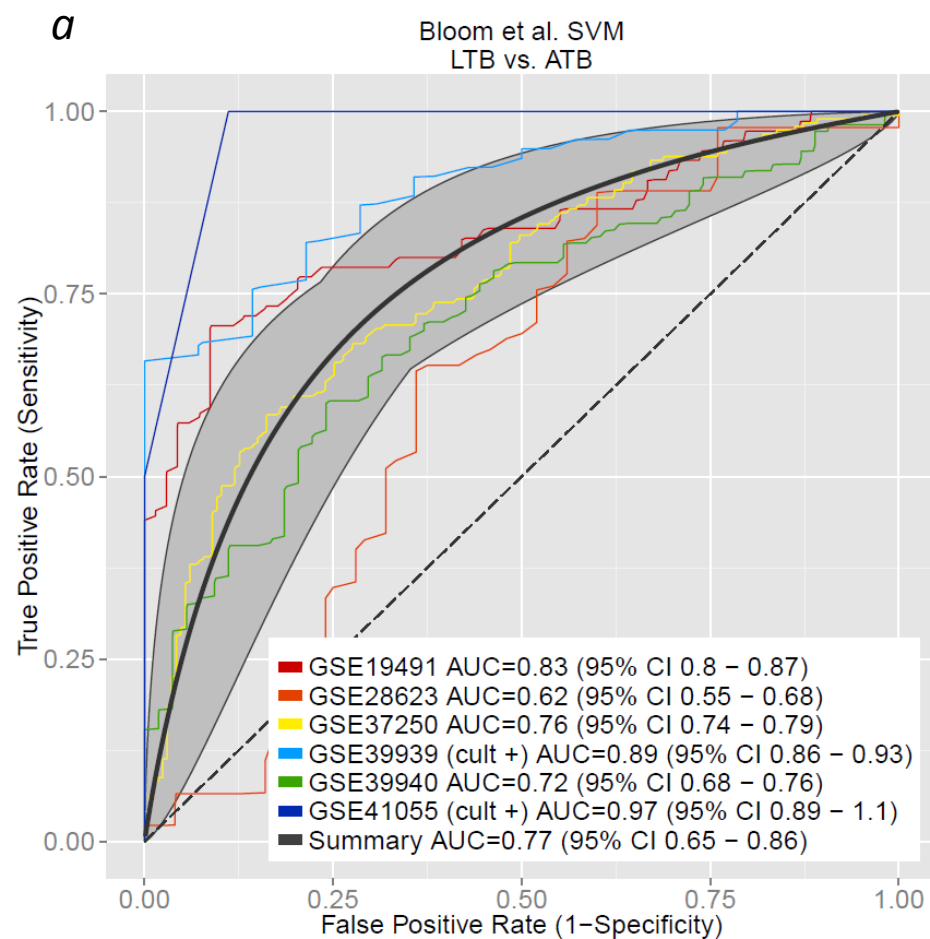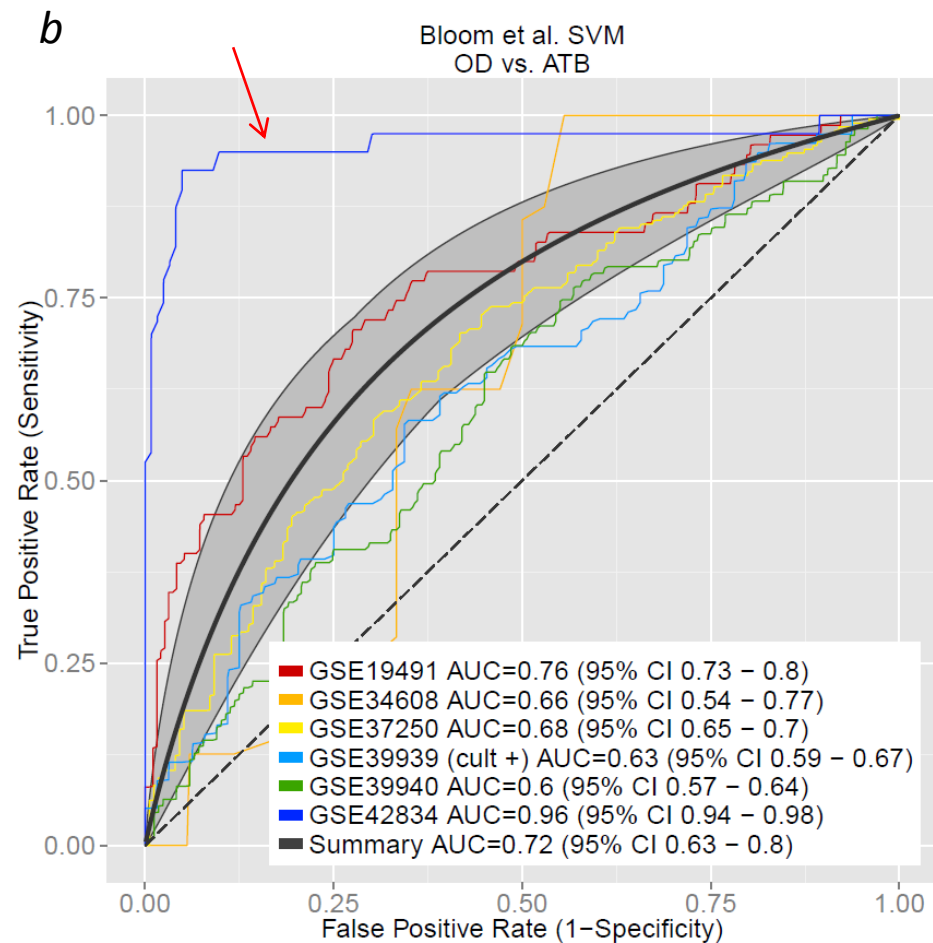

Appendix page 22. Summary ROC plots for the Bloom et al. diagnostic gene set in all publicly available TB gene expression datasets. The red arrow marks the discovery dataset (GSE42834). (a) Latent TB versus active TB; (b) other disease versus active TB. Each dataset was tested using a support vector machine model built in GSE42834 using genes in the 144-transcript set, as in the original paper.

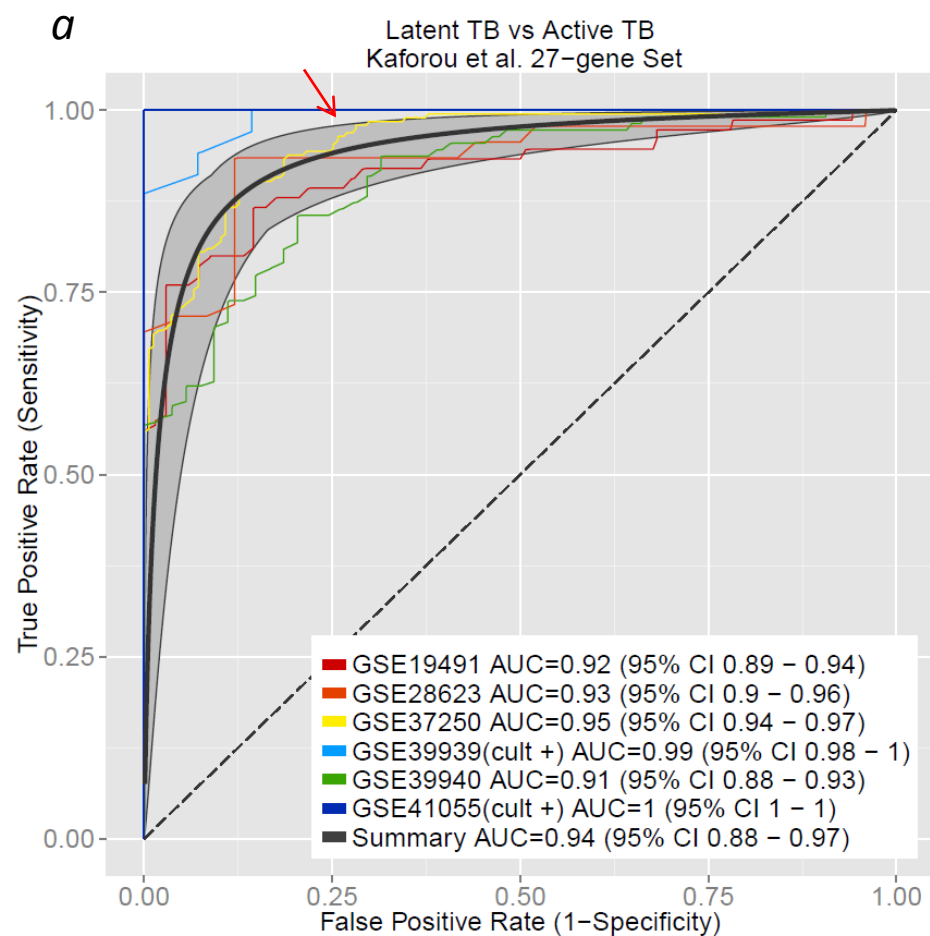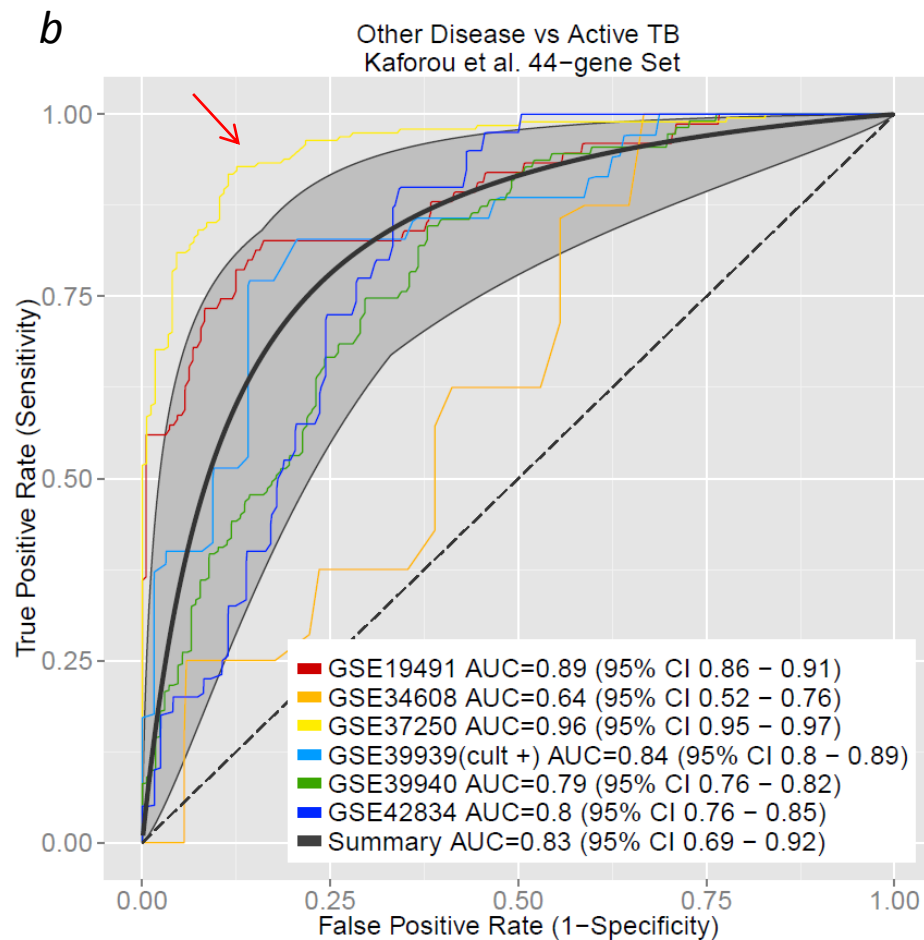

Appendix page 23. Summary ROC plots for the Kaforou et al. diagnostic gene set in all publically available TB gene expression datasets. The red arrow marks the discovery dataset (GSE37250). (a) Latent TB versus active TB; (b) other disease versus active TB. The gene sets were tested with the difference of arithmetic means in each dataset, as in the original paper.



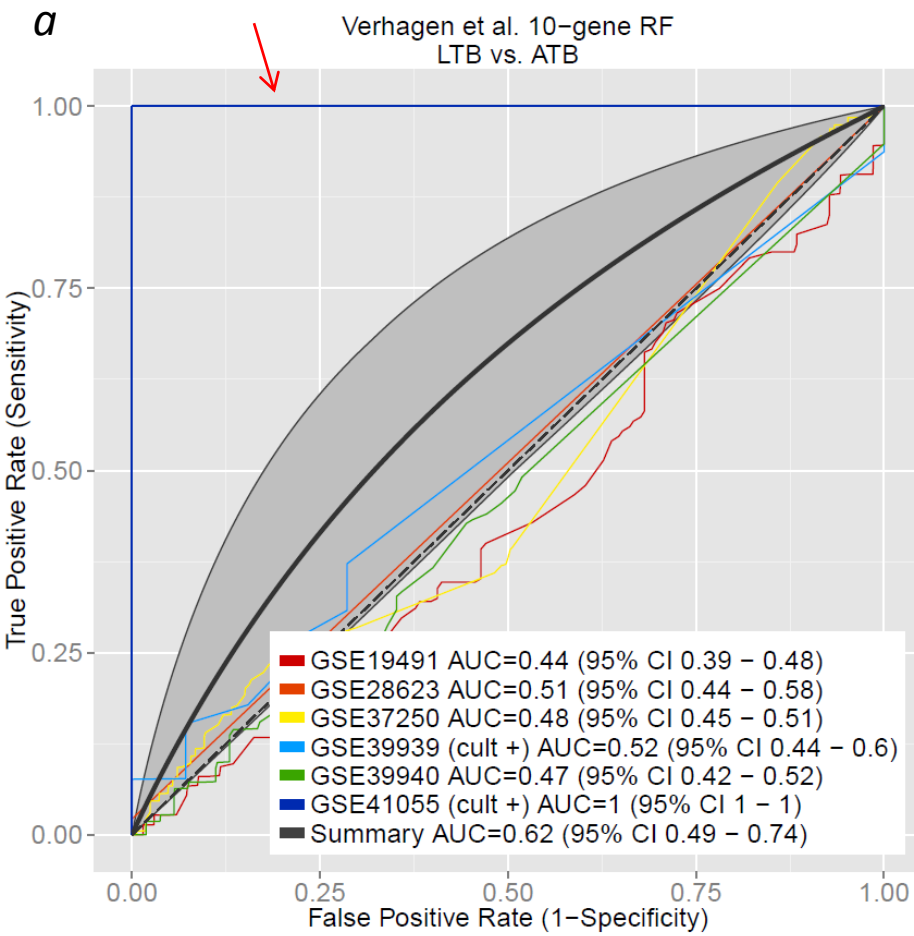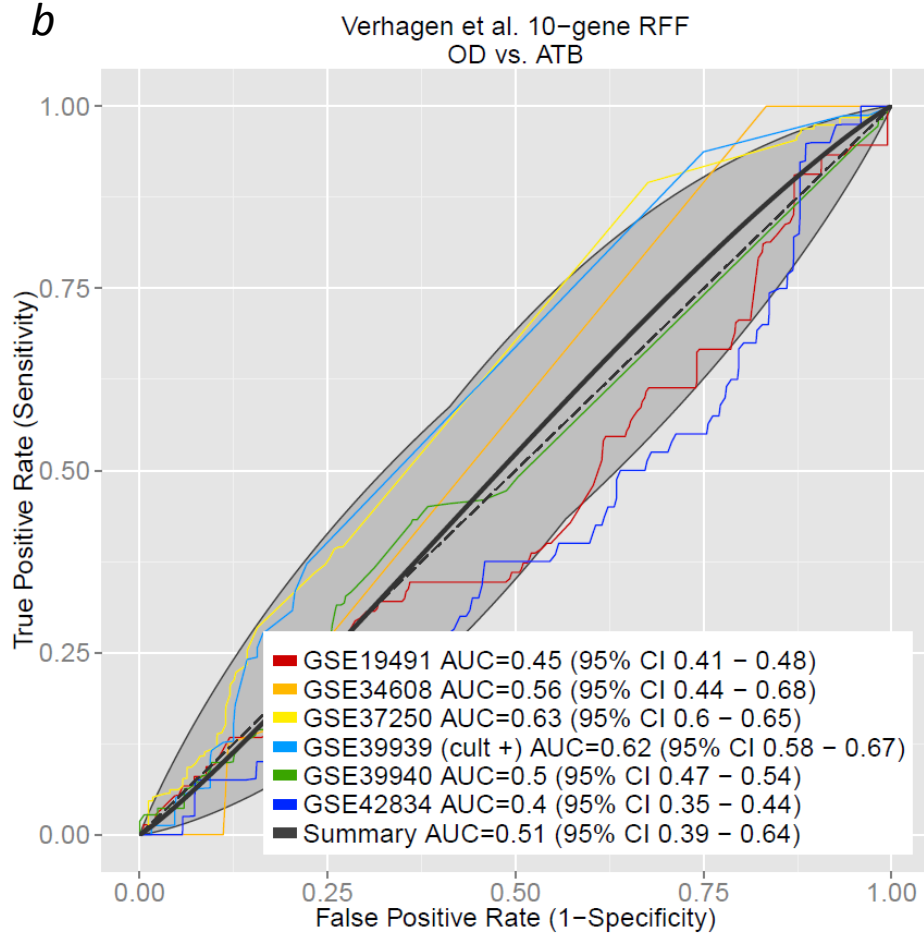

Appendix page 24. Summary ROC plots for the Verhagen et al. diagnostic gene set in all publically available TB gene expression datasets. The red arrow marks the discovery dataset (GSE41055). (a) Latent TB versus active TB; (b) other disease versus active TB. Each dataset was tested against a random forest model built in GSE41055 using the 10-gene set, as in the original paper.

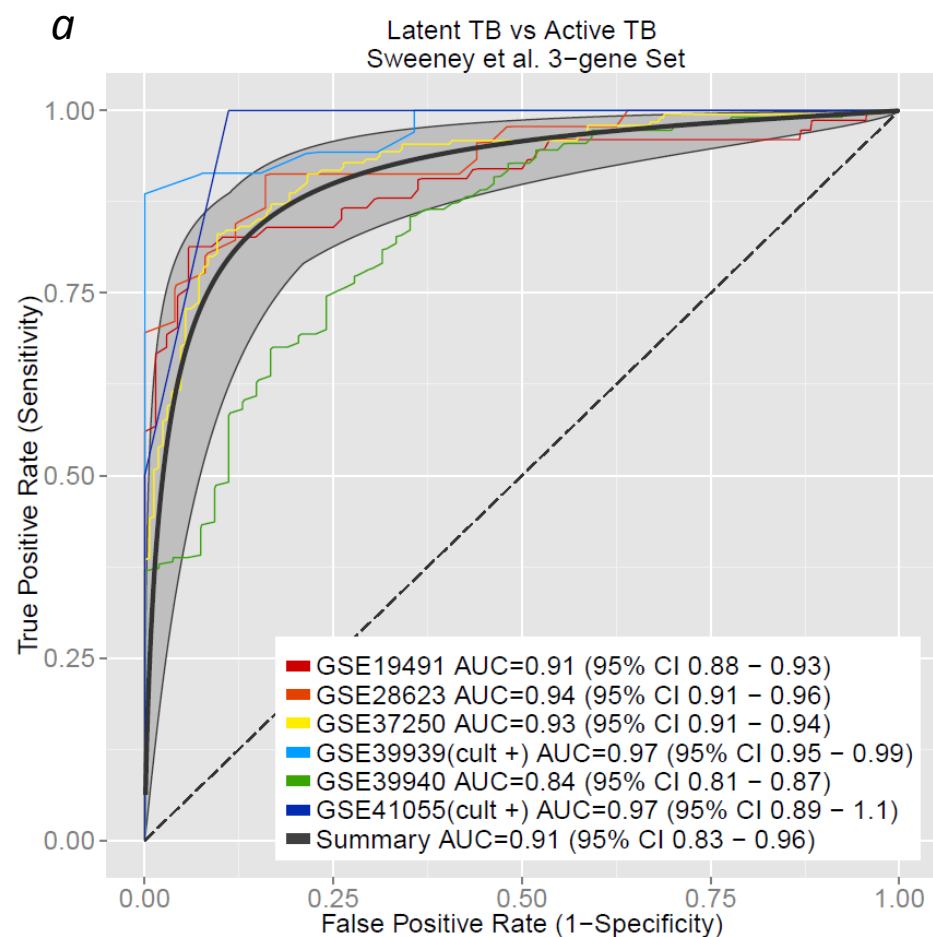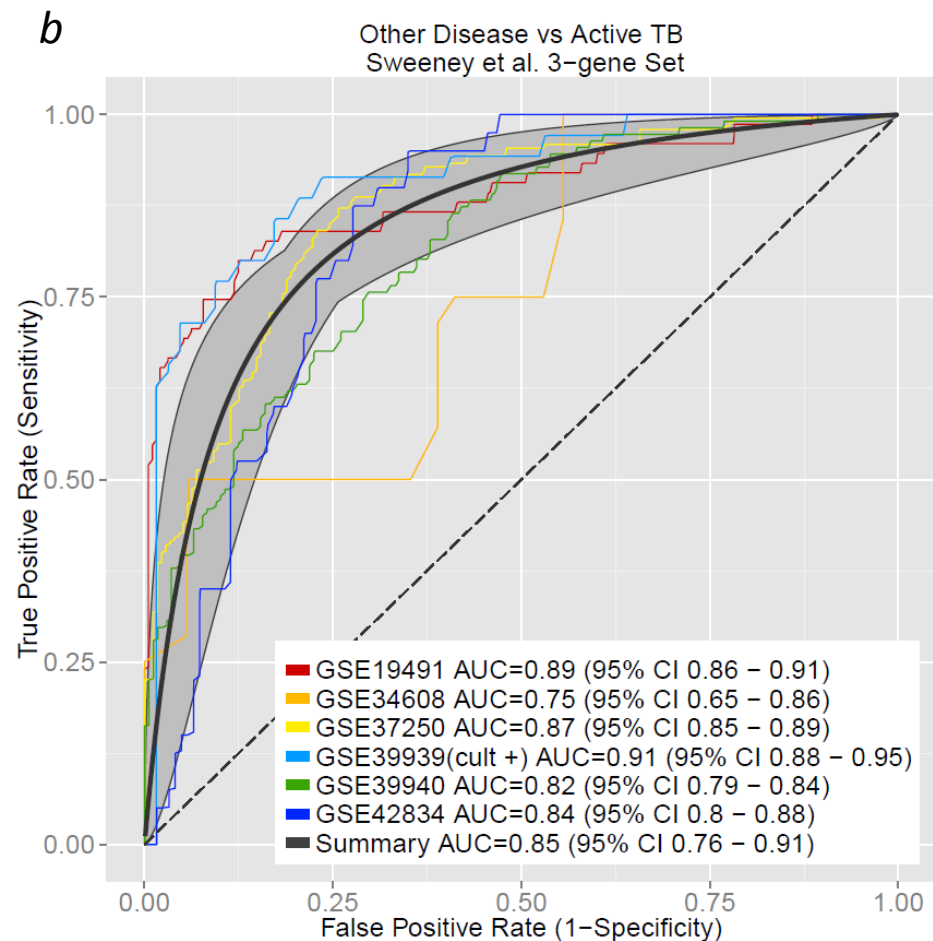

Appendix page 25. The TB score from the three-gene set (as described in the text) is shown. (a) Latent TB versus active TB; (b) other disease versus active TB. This plot is supplied to allow comparison of the generalizability of the three-gene set and method to the other gene sets and methods that have been reported previously.

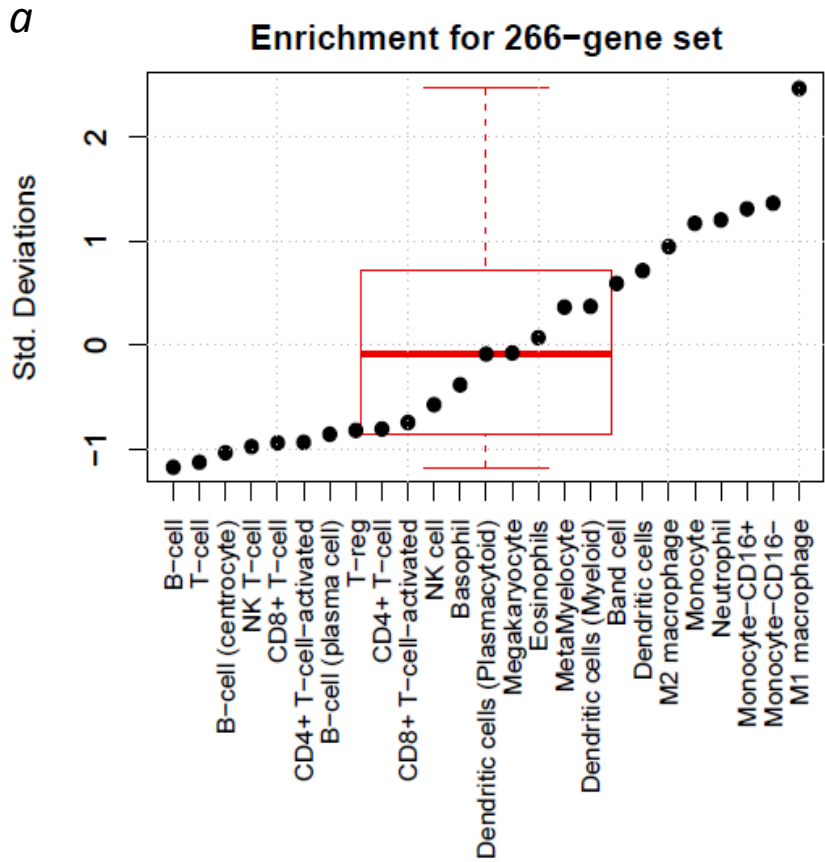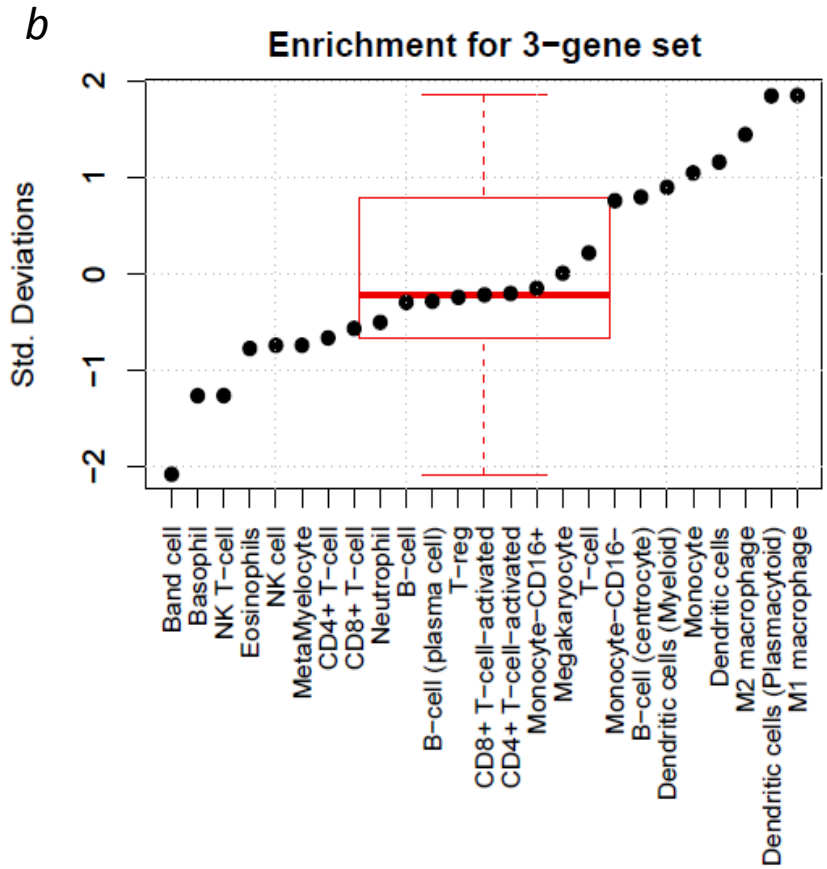

Appendix page 26. Enrichment profiles of (a) all 266 differentially expressed genes and (b) the 4 diagnostic genes in publically available sorted-cell gene expression profiles. Y-axis shows standard deviations from the mean. Both gene sets are significantly enriched in M1 macrophages compared to other cell types ( $p < 0.05$ ).
